# Supplementary material for: Estimating Lithium Concentrations in Groundwater Used as Drinking Water for the Conterminous United States
Source: PubMed Central journal article supplement — Environ Sci Technol. 2024 Jan 2;58(2):1255–64. doi: 10.1021/acs.est.3c03315 (PMC10795177; doi:10.1021/acs.est.3c03315), 2024-01-02
Supplement: es3c03315_si_001.pdf [file es3c03315_si_001.pdf]

Estimating lithium concentrations in groundwater used as drinking water for the conterminous United States as a Tool for Human Exposure Assessment

Melissa A. Lombard, Eric Brown, Daniel Saftner, Monica Arienzo, Esme Fuller-Thomson, Craig Brown, Joseph Ayotte

Supporting Information

21 pages

7 tables

6 figures

Table SI\_1 Well and water quality characteristics from wells across the conterminous United States.

| Characteristic                    | Minimum    | Median     | Average    | Maximum    | NA   |
|-----------------------------------|------------|------------|------------|------------|------|
| Depth (feet)                      | 3.0        | 174        | 303.8      | 4908       |      |
| Lithium (Li) concentration (ug/L) | 0.001      | 6.74       | 19.42      | 15000      |      |
| pH                                | 3.62       | 7.30       | 7.18       | 10.27      | 95   |
| Total dissolved solids            | 150        | 265        | 335        | 1000       | 1279 |
| Sample date                       | 1989-01-09 | 2008-06-13 | 2006-08-25 | 2020-11-19 |      |

Table SI\_2 – Number of wells in each lithium (Li) concentration class used in the classification model to estimate geogenic lithium in drinking-water supply wells throughout the conterminous United States.

| Dataset  | Class1 ( $\leq 4$ $\mu\text{g/L}$ ) | Class2 ( $>4$ and $\leq 10$ $\mu\text{g/L}$ ) | Class3 ( $>10$ and $\leq 30$ $\mu\text{g/L}$ ) | Class4 ( $>30$ $\mu\text{g/L}$ ) | Total |
|----------|-------------------------------------|-----------------------------------------------|------------------------------------------------|----------------------------------|-------|
| Training | 5269                                | 2835                                          | 3372                                           | 2046                             | 13522 |
| Testing  | 1756                                | 945                                           | 1123                                           | 681                              | 4505  |
| Total    | 7025                                | 3780                                          | 4495                                           | 2727                             | 18027 |
| Percent  | 39.0                                | 21.0                                          | 24.9                                           | 15.1                             | 100   |

Table SI\_3 – Predictor variables and relative importance for the overall model used to estimate geogenic lithium in drinking-water supply wells throughout the conterminous United States.

| Variable name and data source | Variable description                                                  | Relative importance |
|-------------------------------|-----------------------------------------------------------------------|---------------------|
| ppt_91_20 <sup>37</sup>       | Average annual precipitation from 1991 - 2020                         | 1                   |
| WELL_DEPTH <sup>29, 44</sup>  | Depth of well                                                         | 0.6517              |
| LP_9 <sup>41</sup>            | Lateral position within a watershed for 9 <sup>th</sup> order streams | 0.5717              |
| C_Li <sup>40</sup>            | Lithium concentration in the soil C horizon                           | 0.5706              |
| Zell_trans <sup>42</sup>      | Estimated transmissivity of shallow subsurface                        | 0.5564              |
| C_Calcite <sup>40</sup>       | Calcite concentration in the soil C horizon                           | 0.4786              |
| LP_7 <sup>41</sup>            | Lateral position within a watershed for 7 <sup>th</sup> order streams | 0.4683              |
| C_Al <sup>40</sup>            | Aluminum concentration in the soil C horizon                          | 0.4554              |
| C_Na <sup>40</sup>            | Sodium concentration in the soil C horizon                            | 0.4410              |
| Zell_wc_av <sup>42</sup>      | Long term average water content of unsaturated zone                   | 0.4247              |

|                          |                                                                       |        |
|--------------------------|-----------------------------------------------------------------------|--------|
| LP_5 <sup>41</sup>       | Lateral position within a watershed for 5 <sup>th</sup> order streams | 0.4094 |
| C_Kaolinit <sup>40</sup> | Kaolinite concentration in the soil C horizon                         | 0.3996 |
| C_Amorphou <sup>40</sup> | Amorphous content in the soil C horizon                               | 0.3798 |
| LP_3 <sup>41</sup>       | Lateral position within a watershed for 3 <sup>rd</sup> order streams | 0.3777 |
| C_Mg <sup>40</sup>       | Magnesium concentration in the soil C horizon                         | 0.3696 |
| Zell_dtw <sup>42</sup>   | Simulated depth to groundwater                                        | 0.3671 |
| C_Tot_Clay <sup>40</sup> | Total clay in the soil C horizon                                      | 0.3540 |
| C_Quartz <sup>40</sup>   | Quartz concentration in the soil C horizon                            | 0.3538 |
| LP_1 <sup>41</sup>       | Lateral position with a watershed for 1 <sup>st</sup> order streams   | 0.3495 |
| Zell_tt_to <sup>42</sup> | Unsaturated zone long-term average travel time                        | 0.3463 |

Table SI\_4– Relative importance of variables for lithium (Li) classification 1 (Li ≤4 µg/L). Variable descriptions are provided in Table SI\_3.

| Variable   | Relative Importance |
|------------|---------------------|
| ppt_91_20  | 1.0000              |
| WELL_DEPTH | 0.5339              |
| C_Li       | 0.4636              |
| LP_9       | 0.4234              |
| C_Al       | 0.4114              |
| C_Calcite  | 0.3934              |
| Zell_trans | 0.3862              |
| C_Kaolinit | 0.3226              |
| LP_7       | 0.3203              |
| C_Na       | 0.3171              |
| Zell_wc_av | 0.2927              |
| C_Amorphou | 0.2846              |
| LP_5       | 0.2680              |
| C_Mg       | 0.2678              |
| C_Tot_Clay | 0.2619              |
| C_Quartz   | 0.2585              |
| LP_3       | 0.2519              |
| Zell_tt_to | 0.2478              |
| Zell_dtw   | 0.2312              |
| LP_1       | 0.2199              |

Table SI\_5 - Relative importance of variables for lithium (Li) classification 2 (Li >4 and ≤ 10 µg/L). Variable descriptions are provided in Table SI\_3.

| Variable   | Relative Importance |
|------------|---------------------|
| WELL_DEPTH | 1.0000              |
| ppt_91_20  | 0.9185              |
| Zell_trans | 0.8924              |
| LP_7       | 0.8460              |
| LP_5       | 0.7997              |
| LP_9       | 0.7830              |
| Zell_wc_av | 0.7570              |
| C_Na       | 0.7499              |
| LP_3       | 0.7118              |
| LP_1       | 0.6968              |
| Zell_dtw   | 0.6749              |
| C_Li       | 0.6467              |
| C_Amorphou | 0.5948              |
| C_Kaolinit | 0.5842              |
| C_Mg       | 0.5689              |
| C_Tot_Clay | 0.5588              |
| C_Quartz   | 0.5549              |
| Zell_tt_to | 0.5122              |
| C_Calcite  | 0.4893              |
| C_Al       | 0.4811              |

Table SI\_6 – Relative importance of variables for lithium (Li) classification 3 (Li >10 and ≤30 µg/L). Variable descriptions are provided in Table SI\_3.

| Variable   | Relative Importance |
|------------|---------------------|
| ppt_91_20  | 1.0000              |
| WELL_DEPTH | 0.7956              |
| Zell_trans | 0.7380              |
| C_Li       | 0.7317              |
| LP_9       | 0.6577              |
| LP_7       | 0.6088              |
| C_Al       | 0.5868              |
| Zell_wc_av | 0.5392              |
| LP_5       | 0.5286              |
| C_Mg       | 0.5235              |
| LP_3       | 0.5187              |
| C_Amorphou | 0.5149              |
| C_Na       | 0.5081              |

|            |        |
|------------|--------|
| C_Kaolinit | 0.5007 |
| Zell_dtw   | 0.4972 |
| LP_1       | 0.4874 |
| Zell_tt_to | 0.4867 |
| C_Calcite  | 0.4738 |
| C_Tot_Clay | 0.4488 |
| C_Quartz   | 0.4390 |

Table SI\_7 – Relative importance of variables for lithium (Li) classification 4 (Li > 30 µg/L). Variable descriptions are provided in Table SI\_3.

| Variable   | Relative Importance |
|------------|---------------------|
| ppt_91_20  | 1.0000              |
| LP_9       | 0.6195              |
| C_Calcite  | 0.6032              |
| C_Li       | 0.5616              |
| WELL_DEPTH | 0.5221              |
| Zell_trans | 0.4988              |
| C_Na       | 0.4139              |
| C_Al       | 0.3933              |
| LP_7       | 0.3858              |
| Zell_wc_av | 0.3621              |
| C_Kaolinit | 0.3342              |
| LP_5       | 0.3282              |
| C_Quartz   | 0.3257              |
| Zell_dtw   | 0.3145              |
| C_Tot_Clay | 0.3106              |
| C_Amorphou | 0.3033              |
| Zell_tt_to | 0.2996              |
| C_Mg       | 0.2985              |
| LP_3       | 0.2841              |
| LP_1       | 0.2591              |

Figure SI\_1 Shapley Additive explanation (SHaP) plots for prediction classification of lithium (Li)  $\leq 4$   $\mu\text{g/L}$ . Variable descriptions are provided in Table SI\_3.

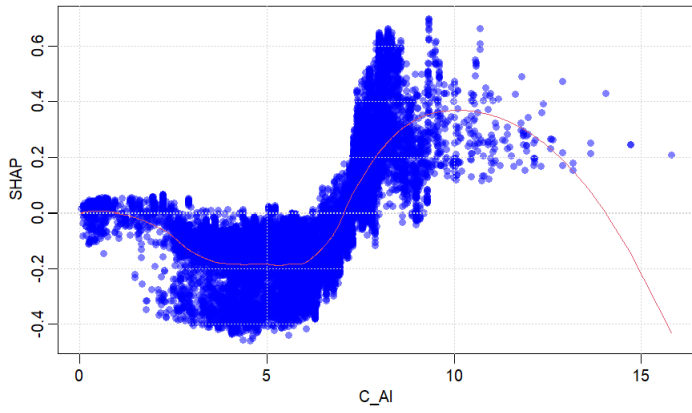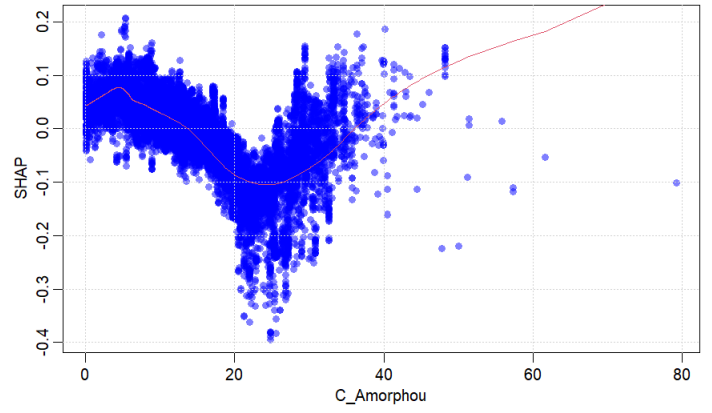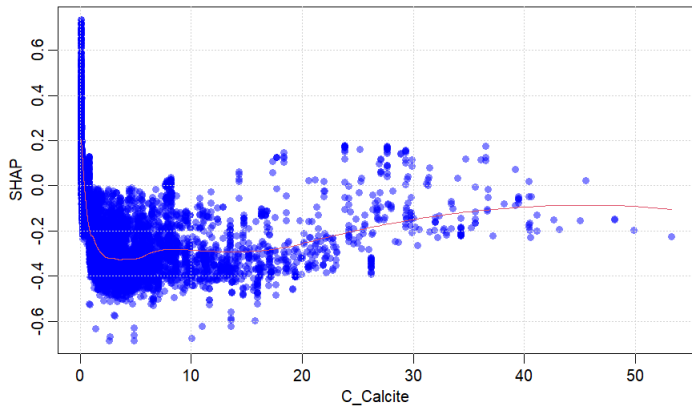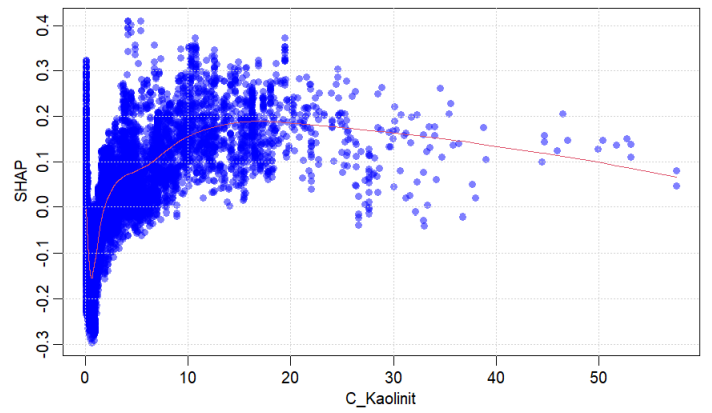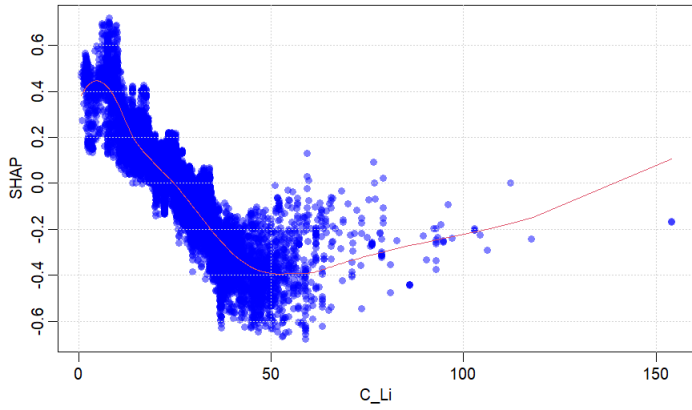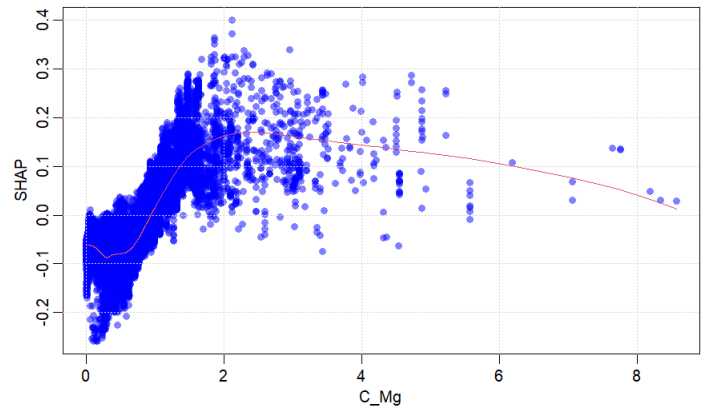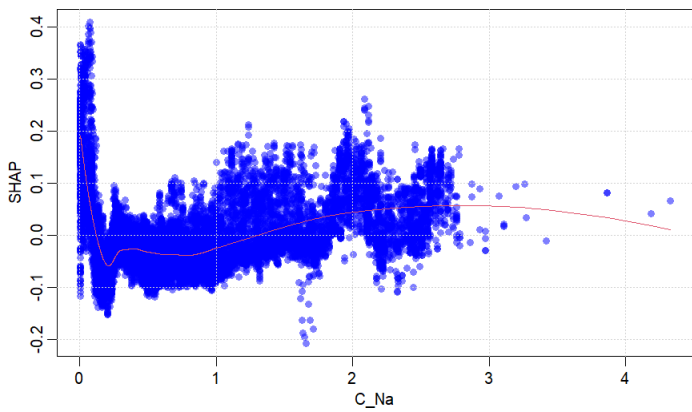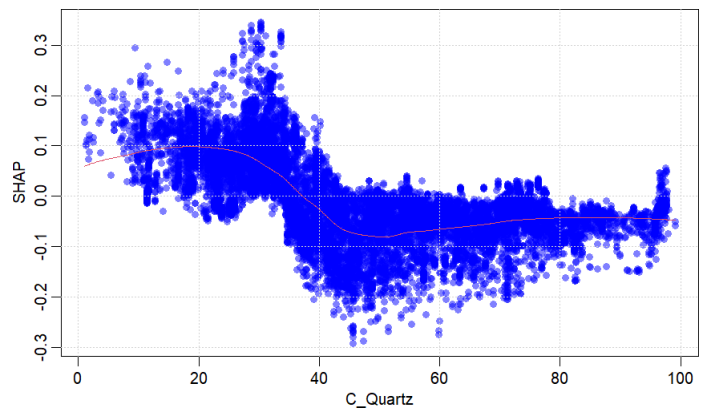

Figure SI\_1 Shapley Additive explanation (SHaP) plots for prediction classification of lithium (Li)  $\leq 4$   $\mu\text{g/L}$ . Variable descriptions are provided in Table SI\_3.

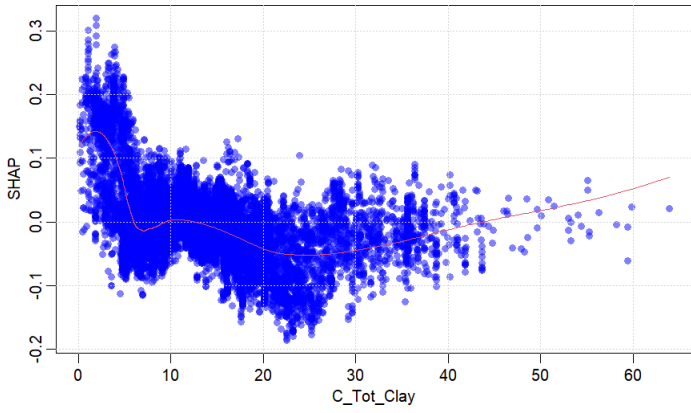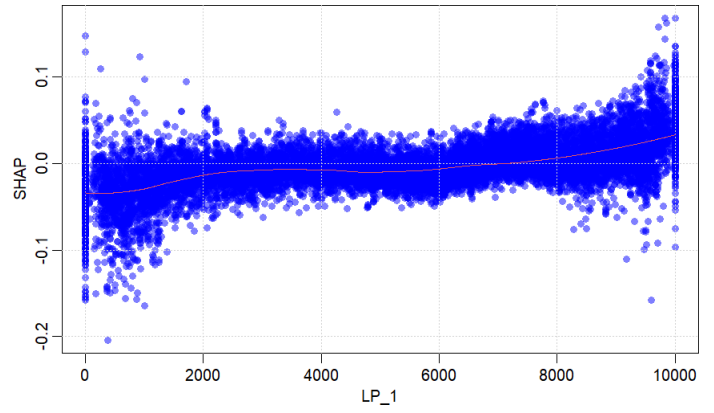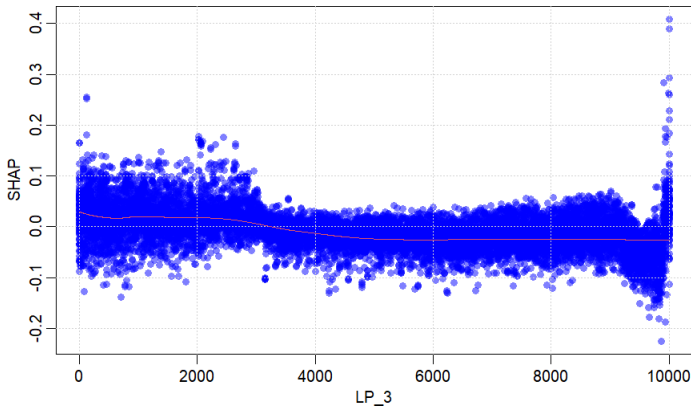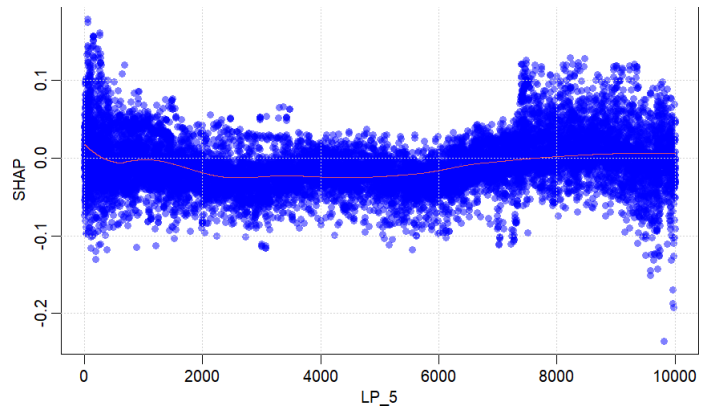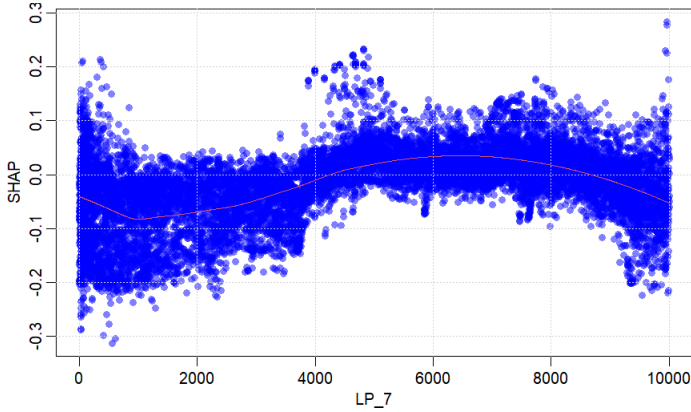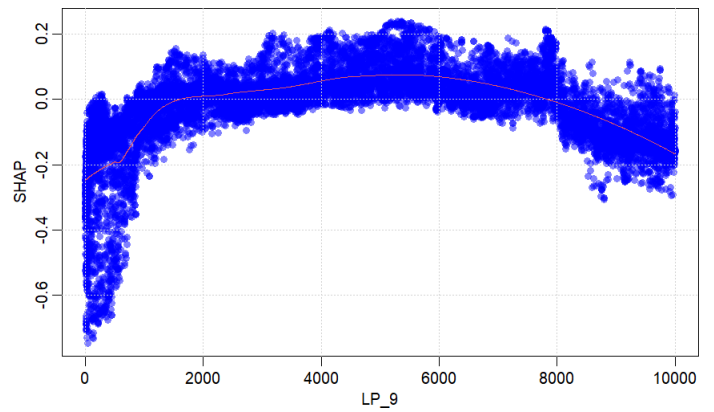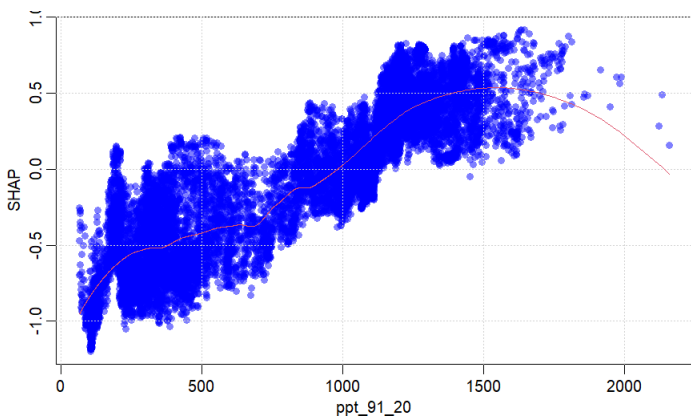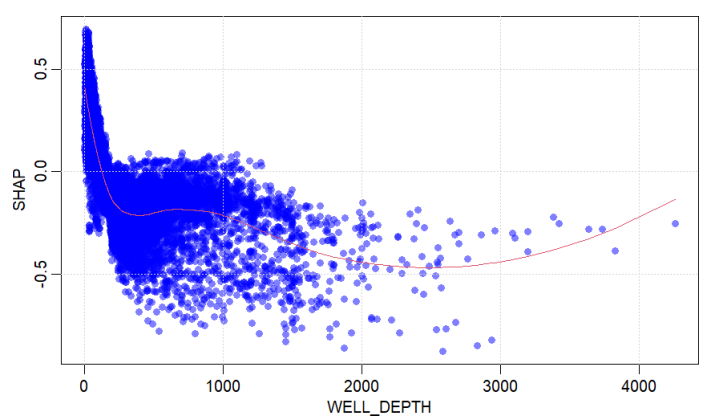

Figure SI\_1 Shapley Additive explanation (SHaP) plots for prediction classification of lithium (Li)  $\leq 4$   $\mu\text{g/L}$ . Variable descriptions are provided in Table SI\_3.

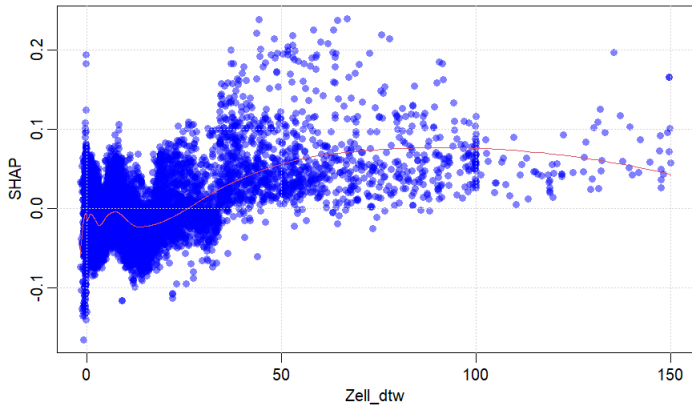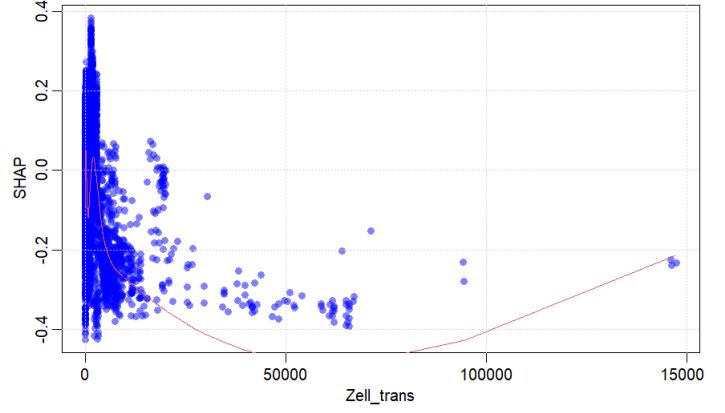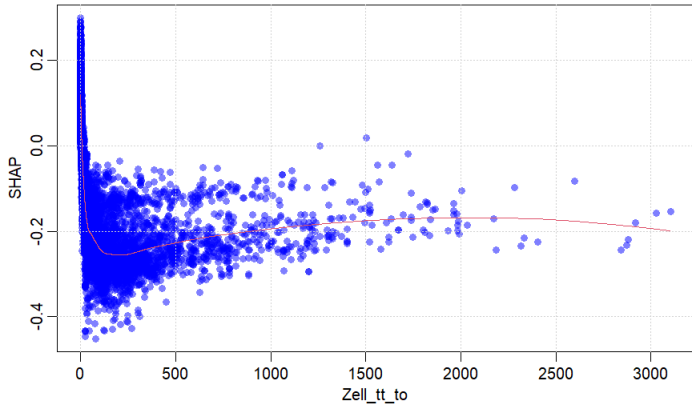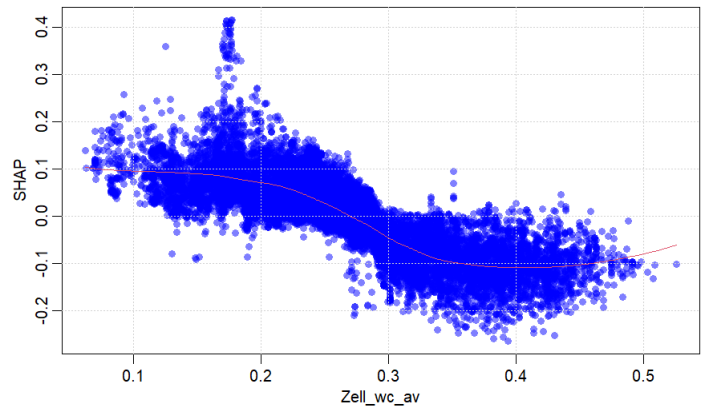



Figure SI\_2 Shapley Additive exPlanation (SHaP) plots for prediction classification of lithium (Li)  $>4$  to  $\leq 10$   $\mu\text{g/L}$ . Variable descriptions are provided in Table SI\_3.

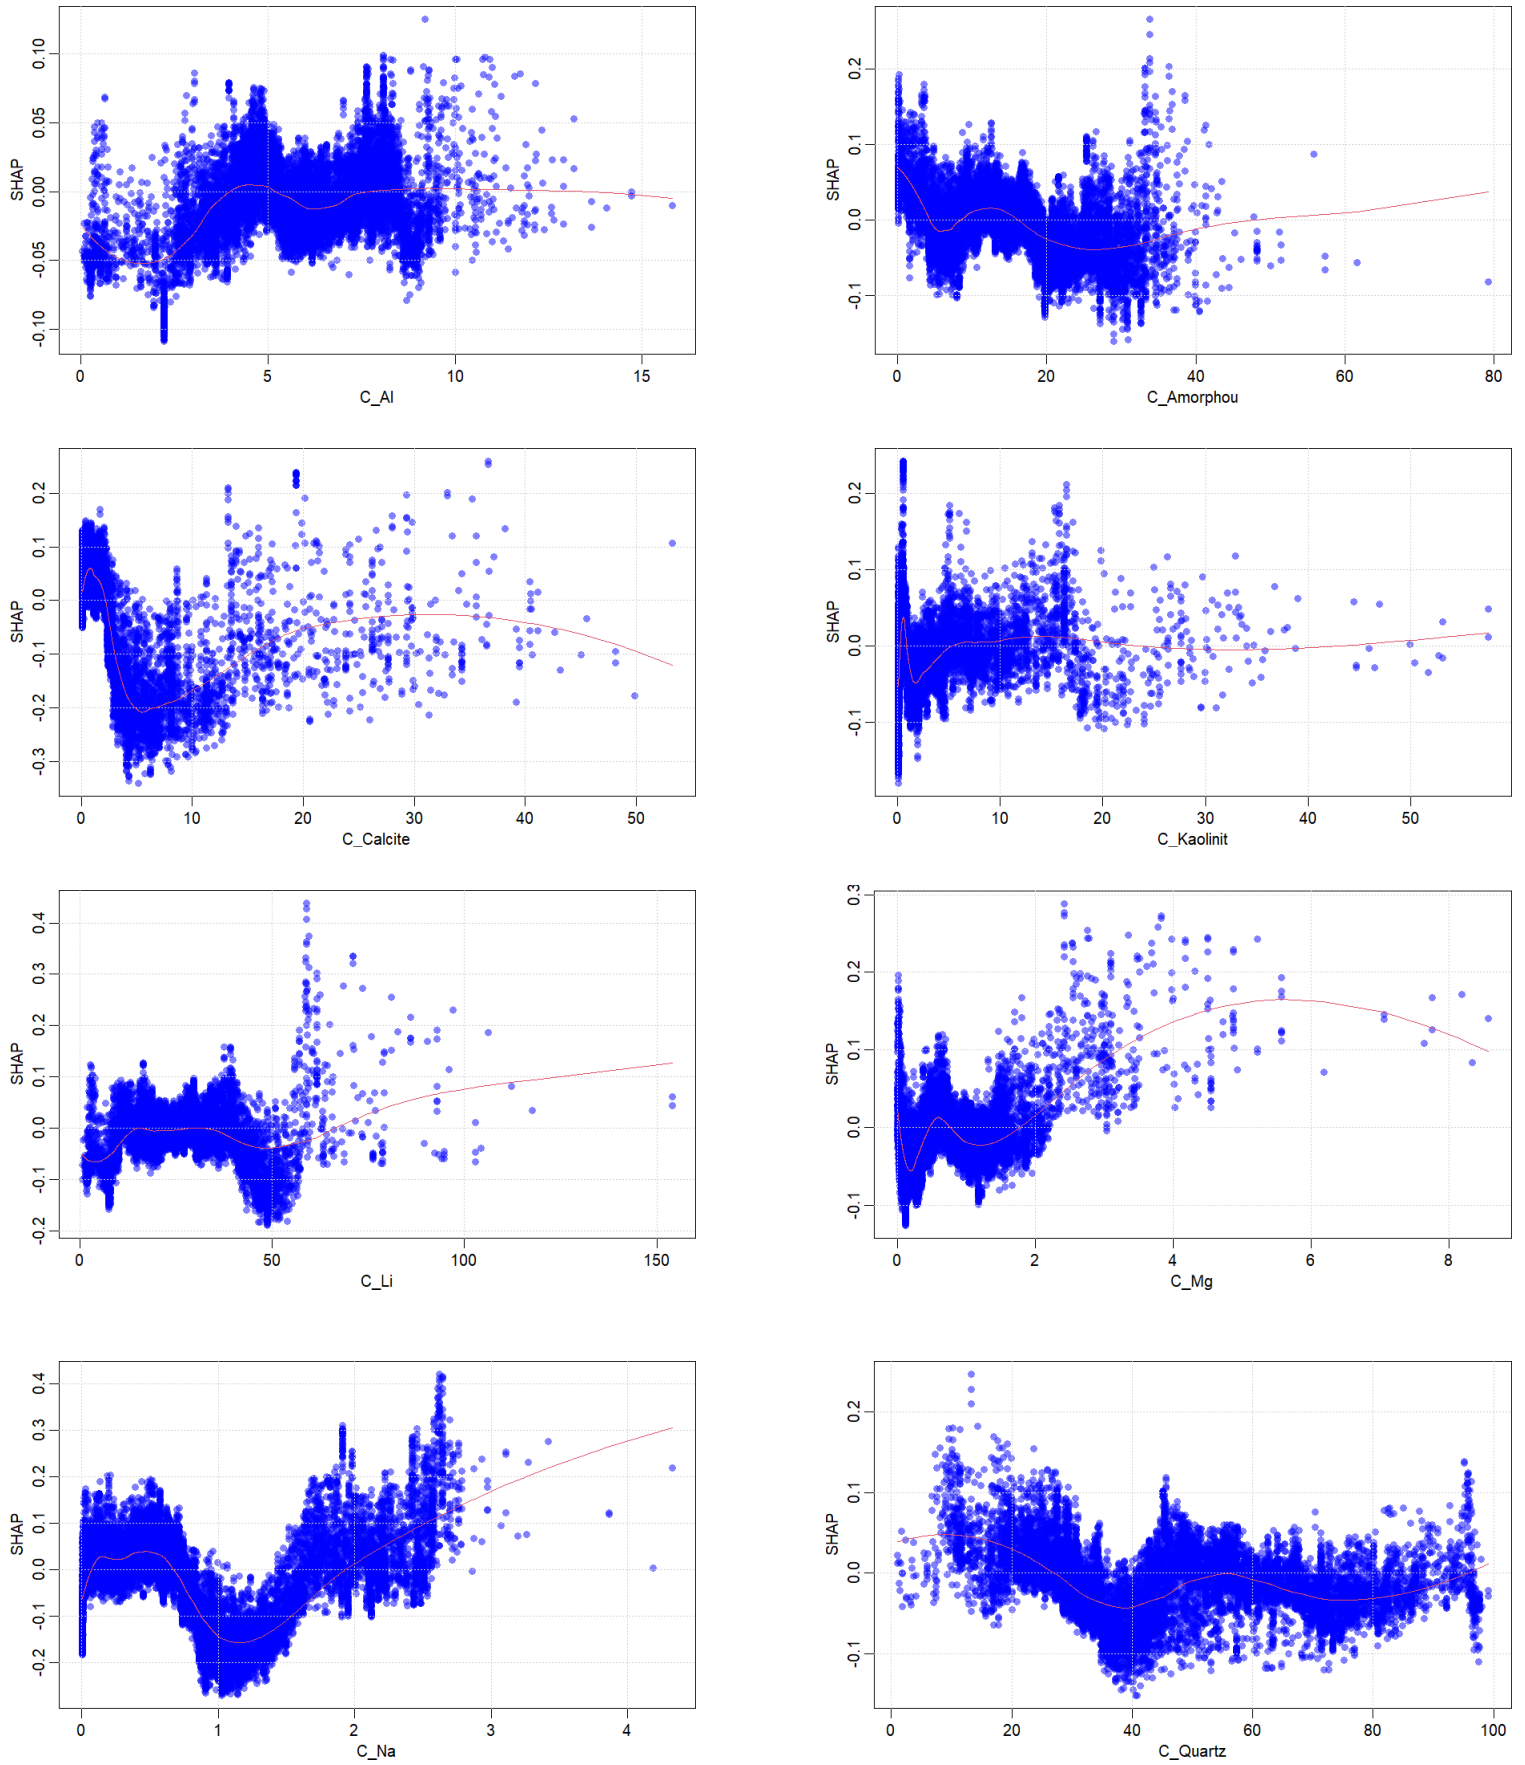

Figure SI\_2 Shapley Additive exPlanation (SHaP) plots for prediction classification of lithium (Li)  $>4$  to  $\leq 10$   $\mu\text{g/L}$ . Variable descriptions are provided in Table SI\_3.

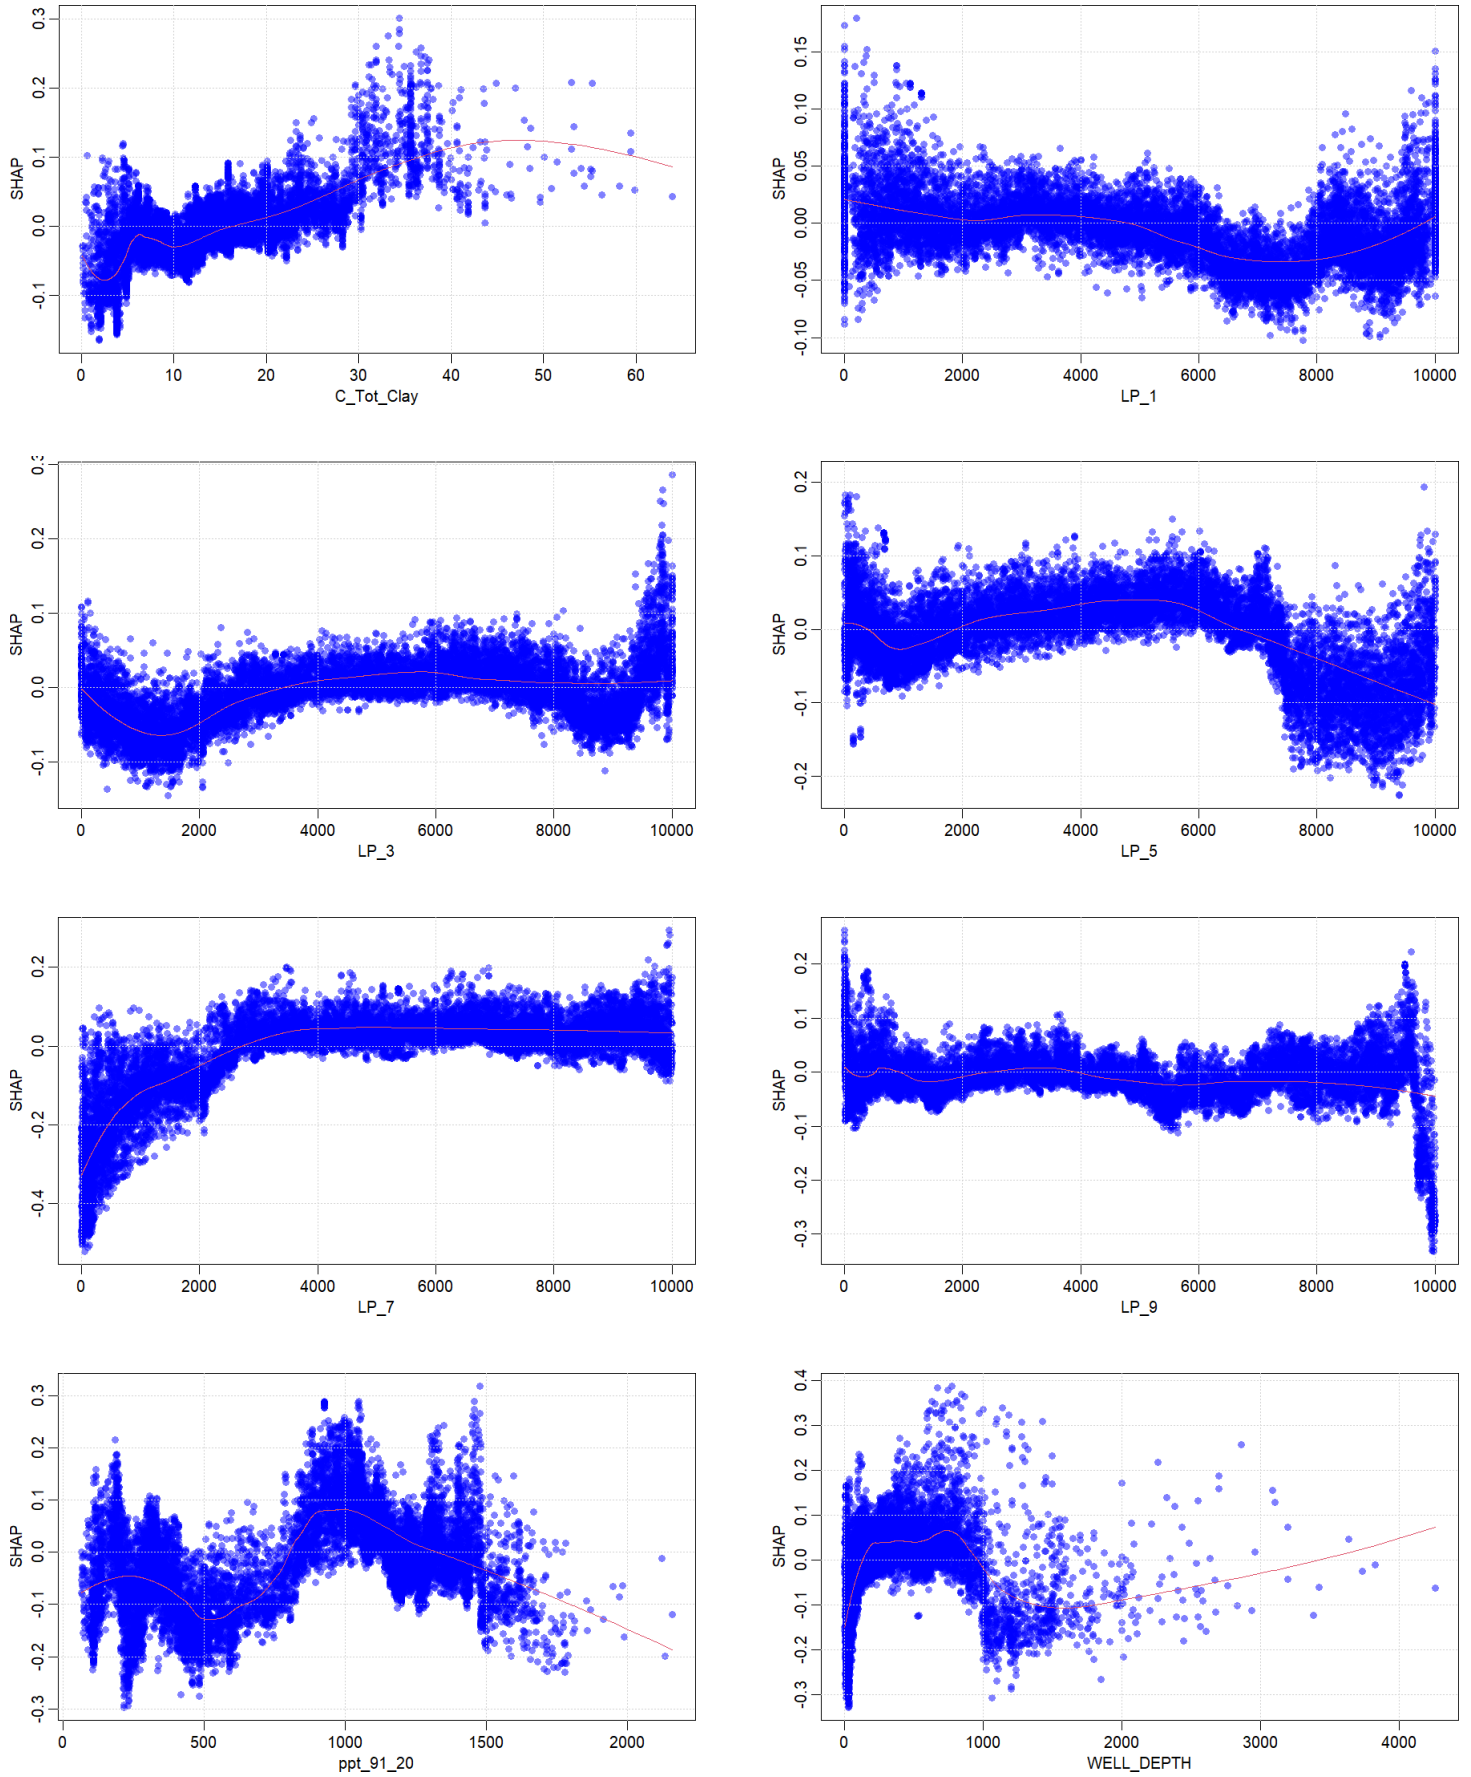

Figure SI\_2 Shapley Additive exPlanation (SHaP) plots for prediction classification of lithium (Li)  $>4$  to  $\leq 10$   $\mu\text{g/L}$ . Variable descriptions are provided in Table SI\_3.

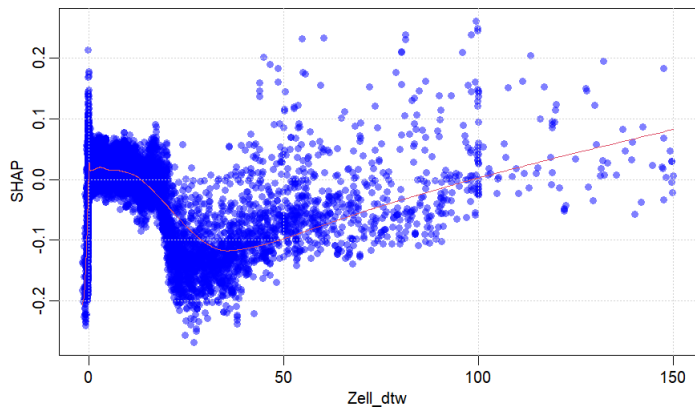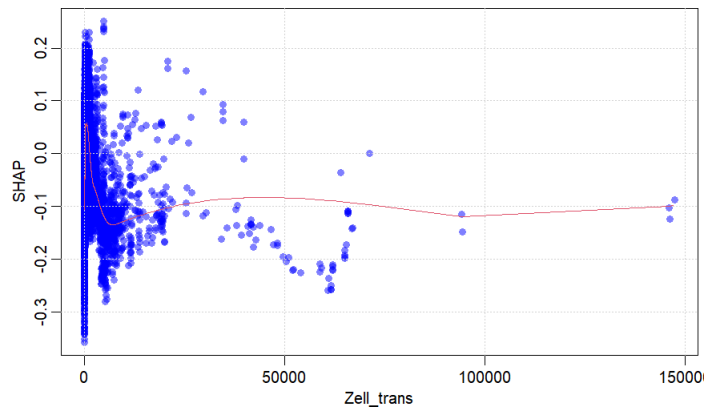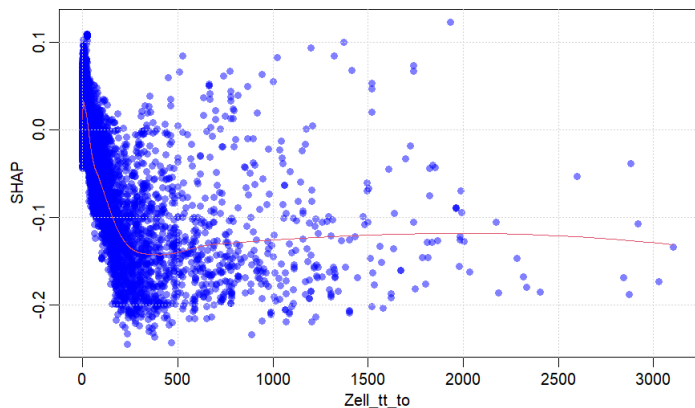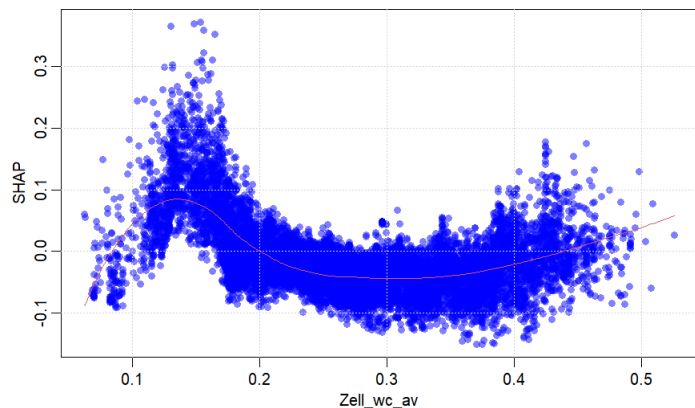

Figure SI\_3 Shapley Additive exPlanation (SHaP) plots for prediction classification of lithium (Li) >10 to ≤30 µg/L. Variable descriptions are provided in Table SI\_3.

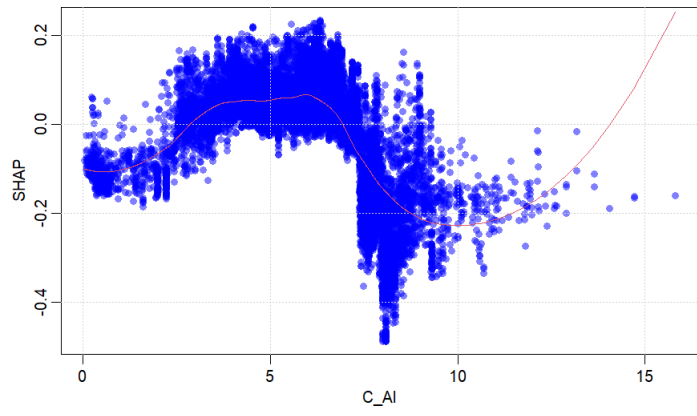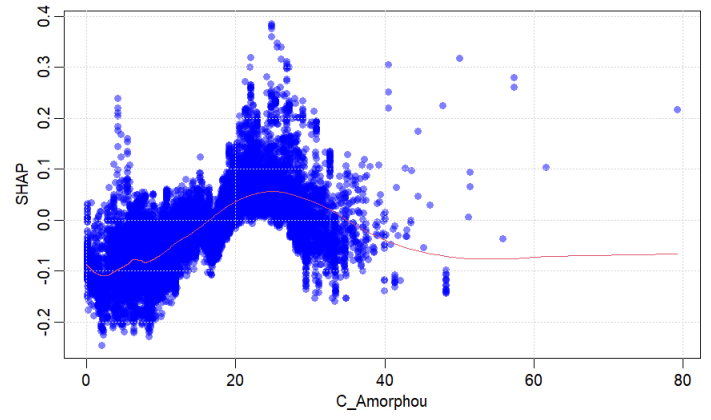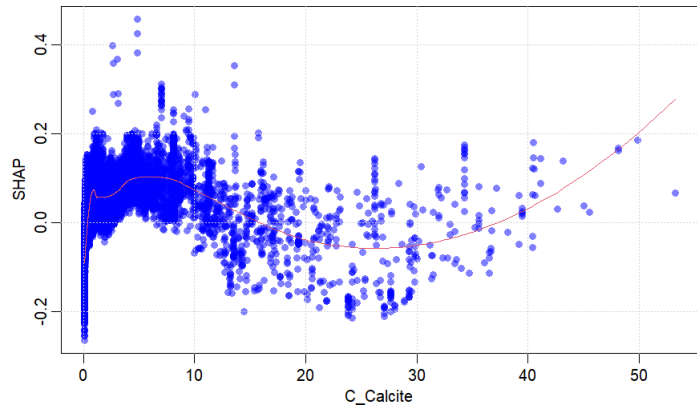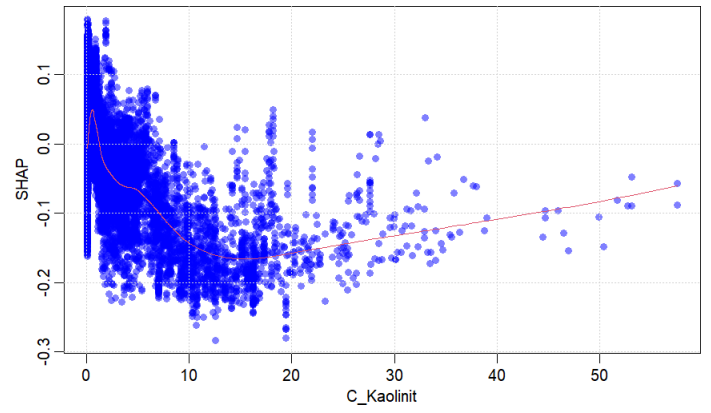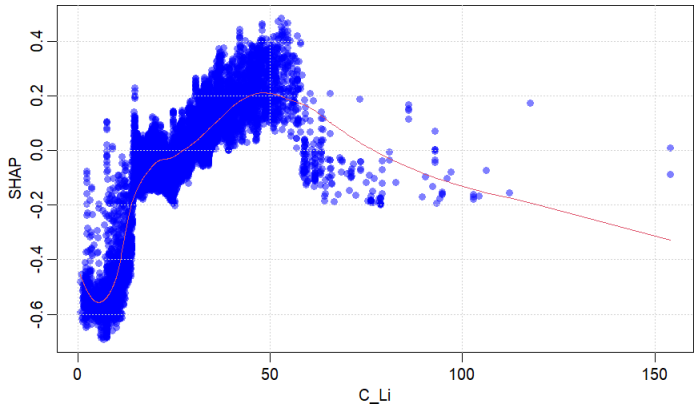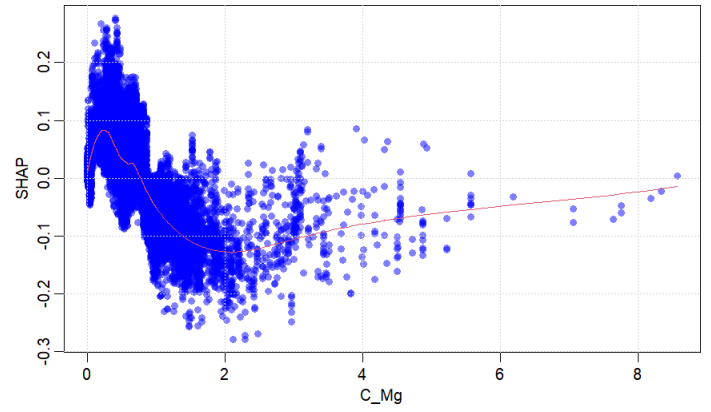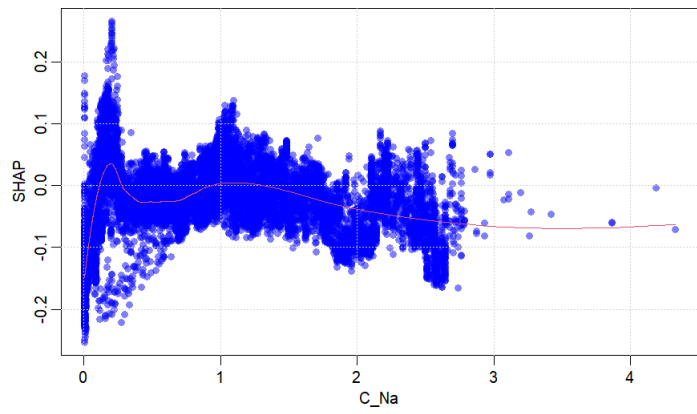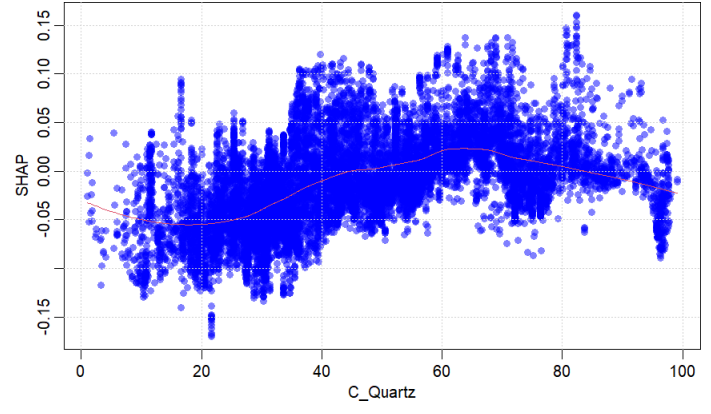

Figure SI\_3 Shapley Additive exPlanation (SHaP) plots for prediction classification of lithium (Li) >10 to ≤30 µg/L. Variable descriptions are provided in Table SI\_3.

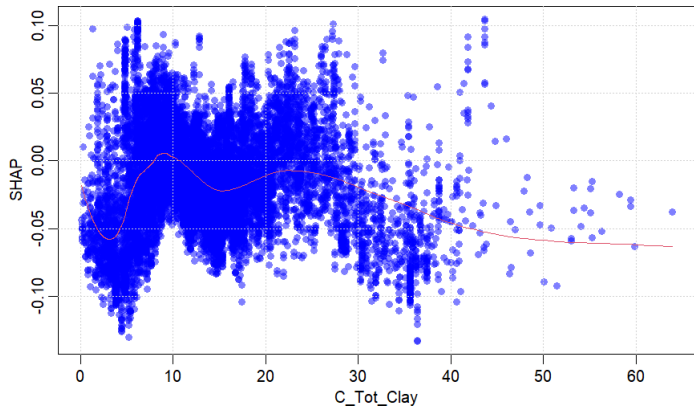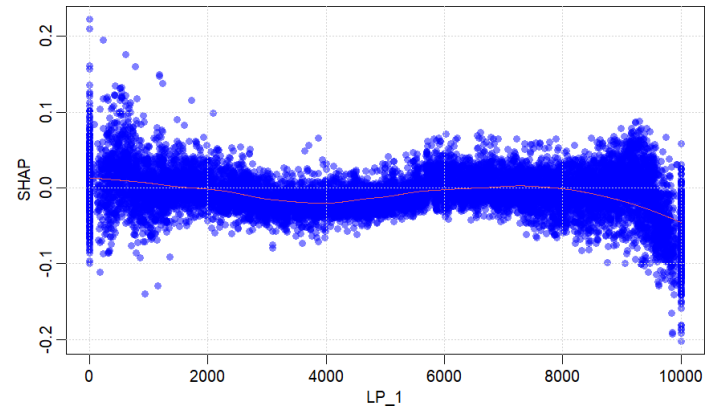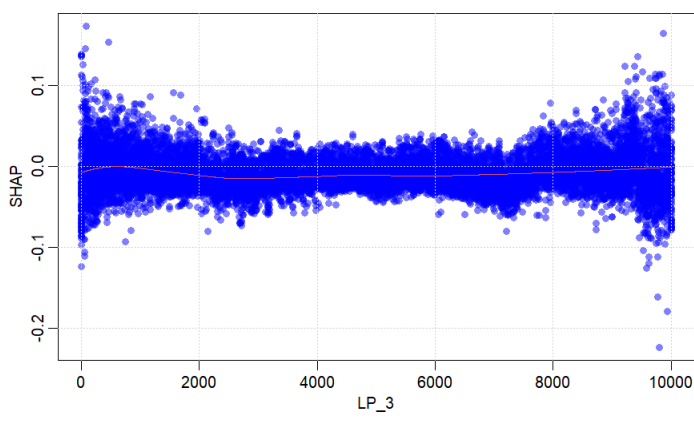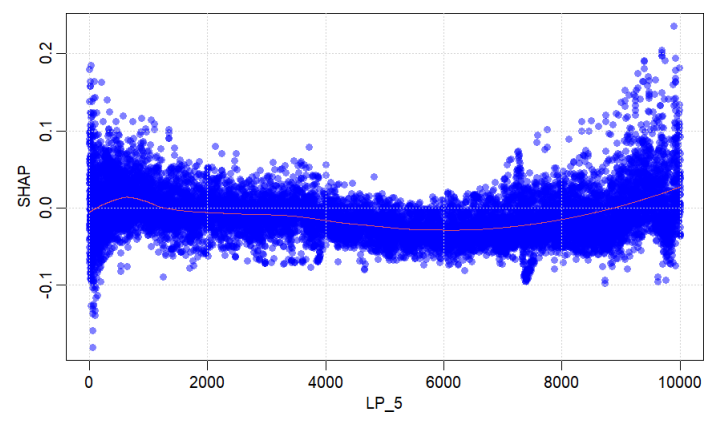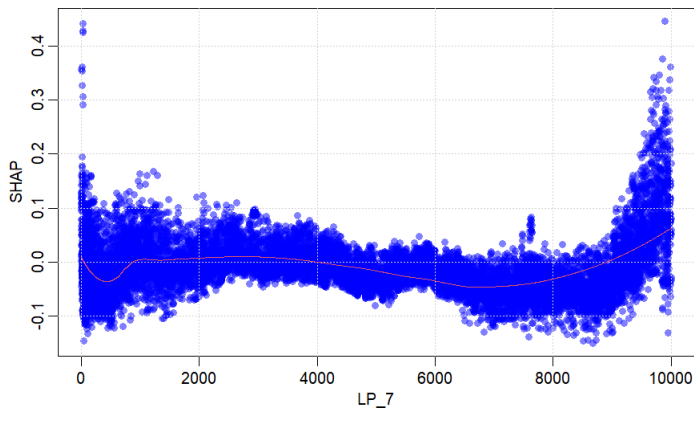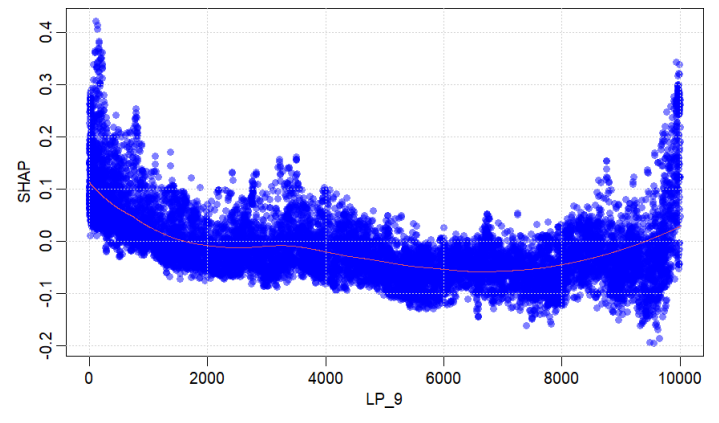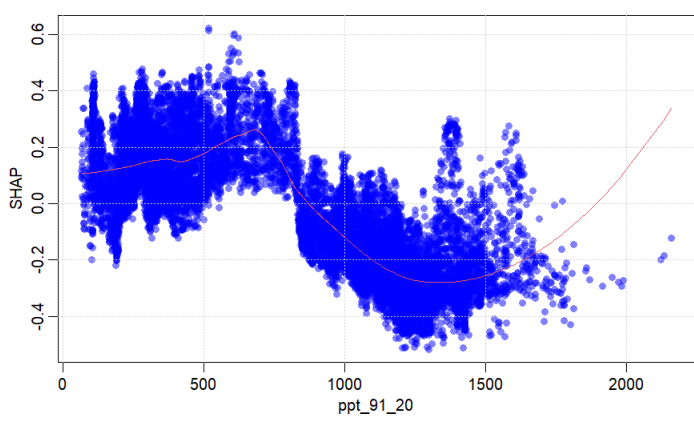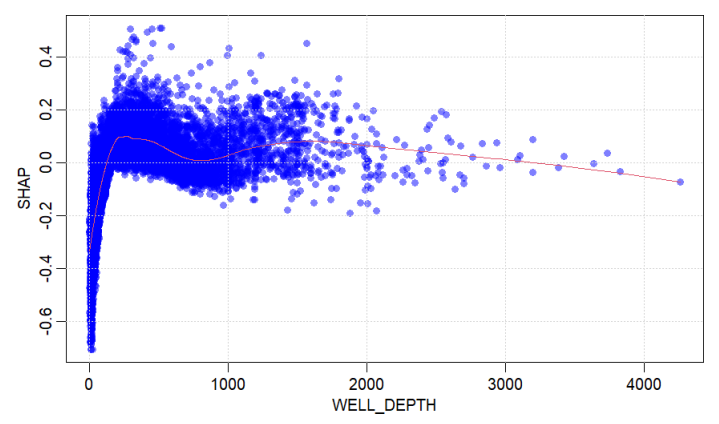

Figure SI\_3 Shapley Additive exPlanation (SHaP) plots for prediction classification of lithium (Li) >10 to ≤30 µg/L. Variable descriptions are provided in Table SI\_3.

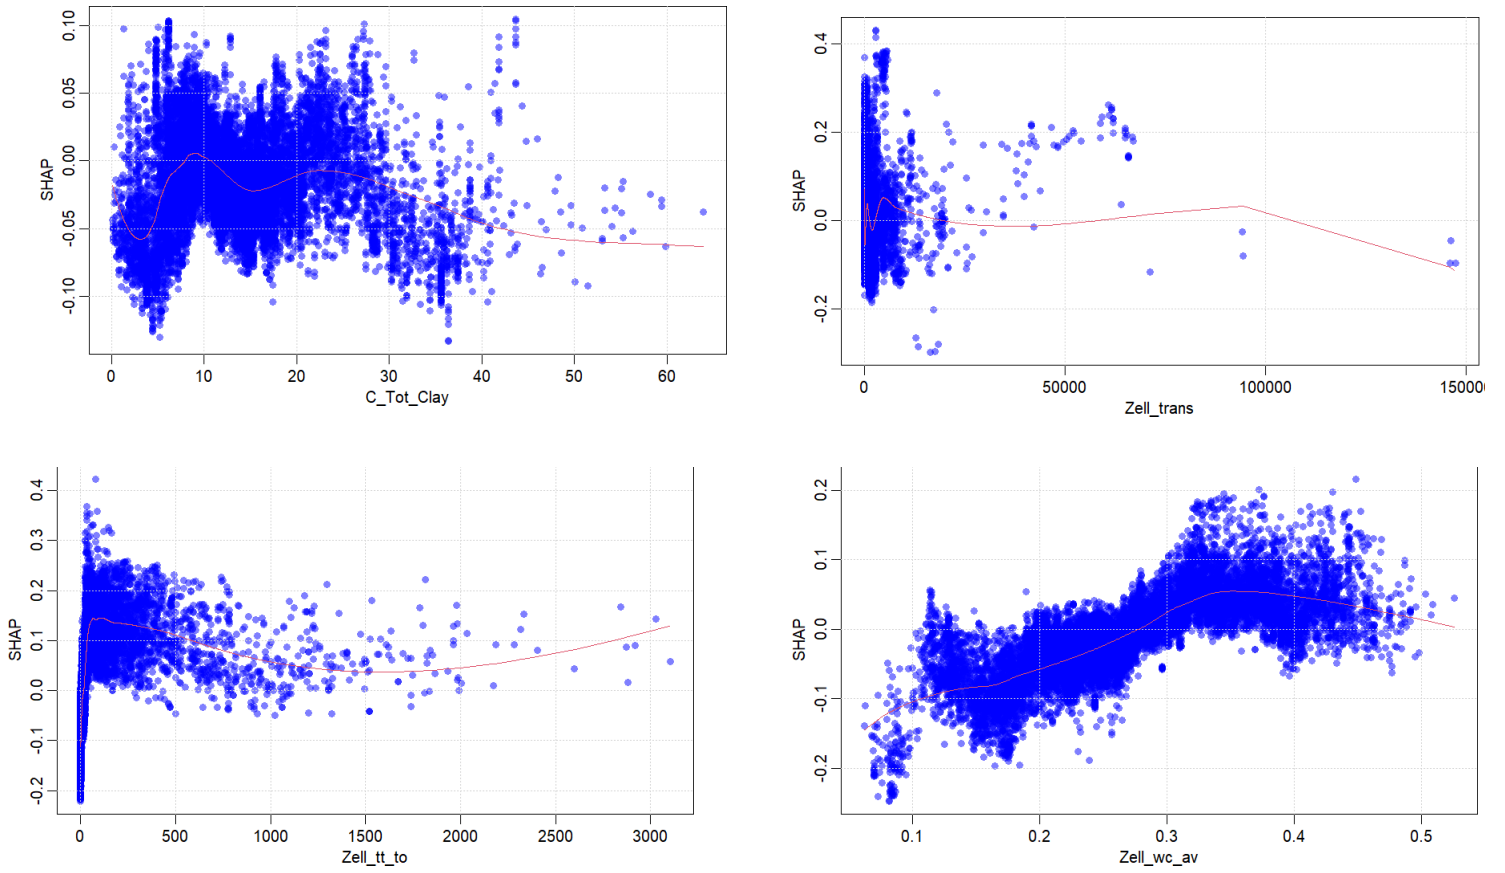

Figure SI\_4 Shapley Additive exPlanation (SHaP) plots for prediction classification of lithium (Li) >30 µg/L. Variable descriptions are provided in Table SI\_3.

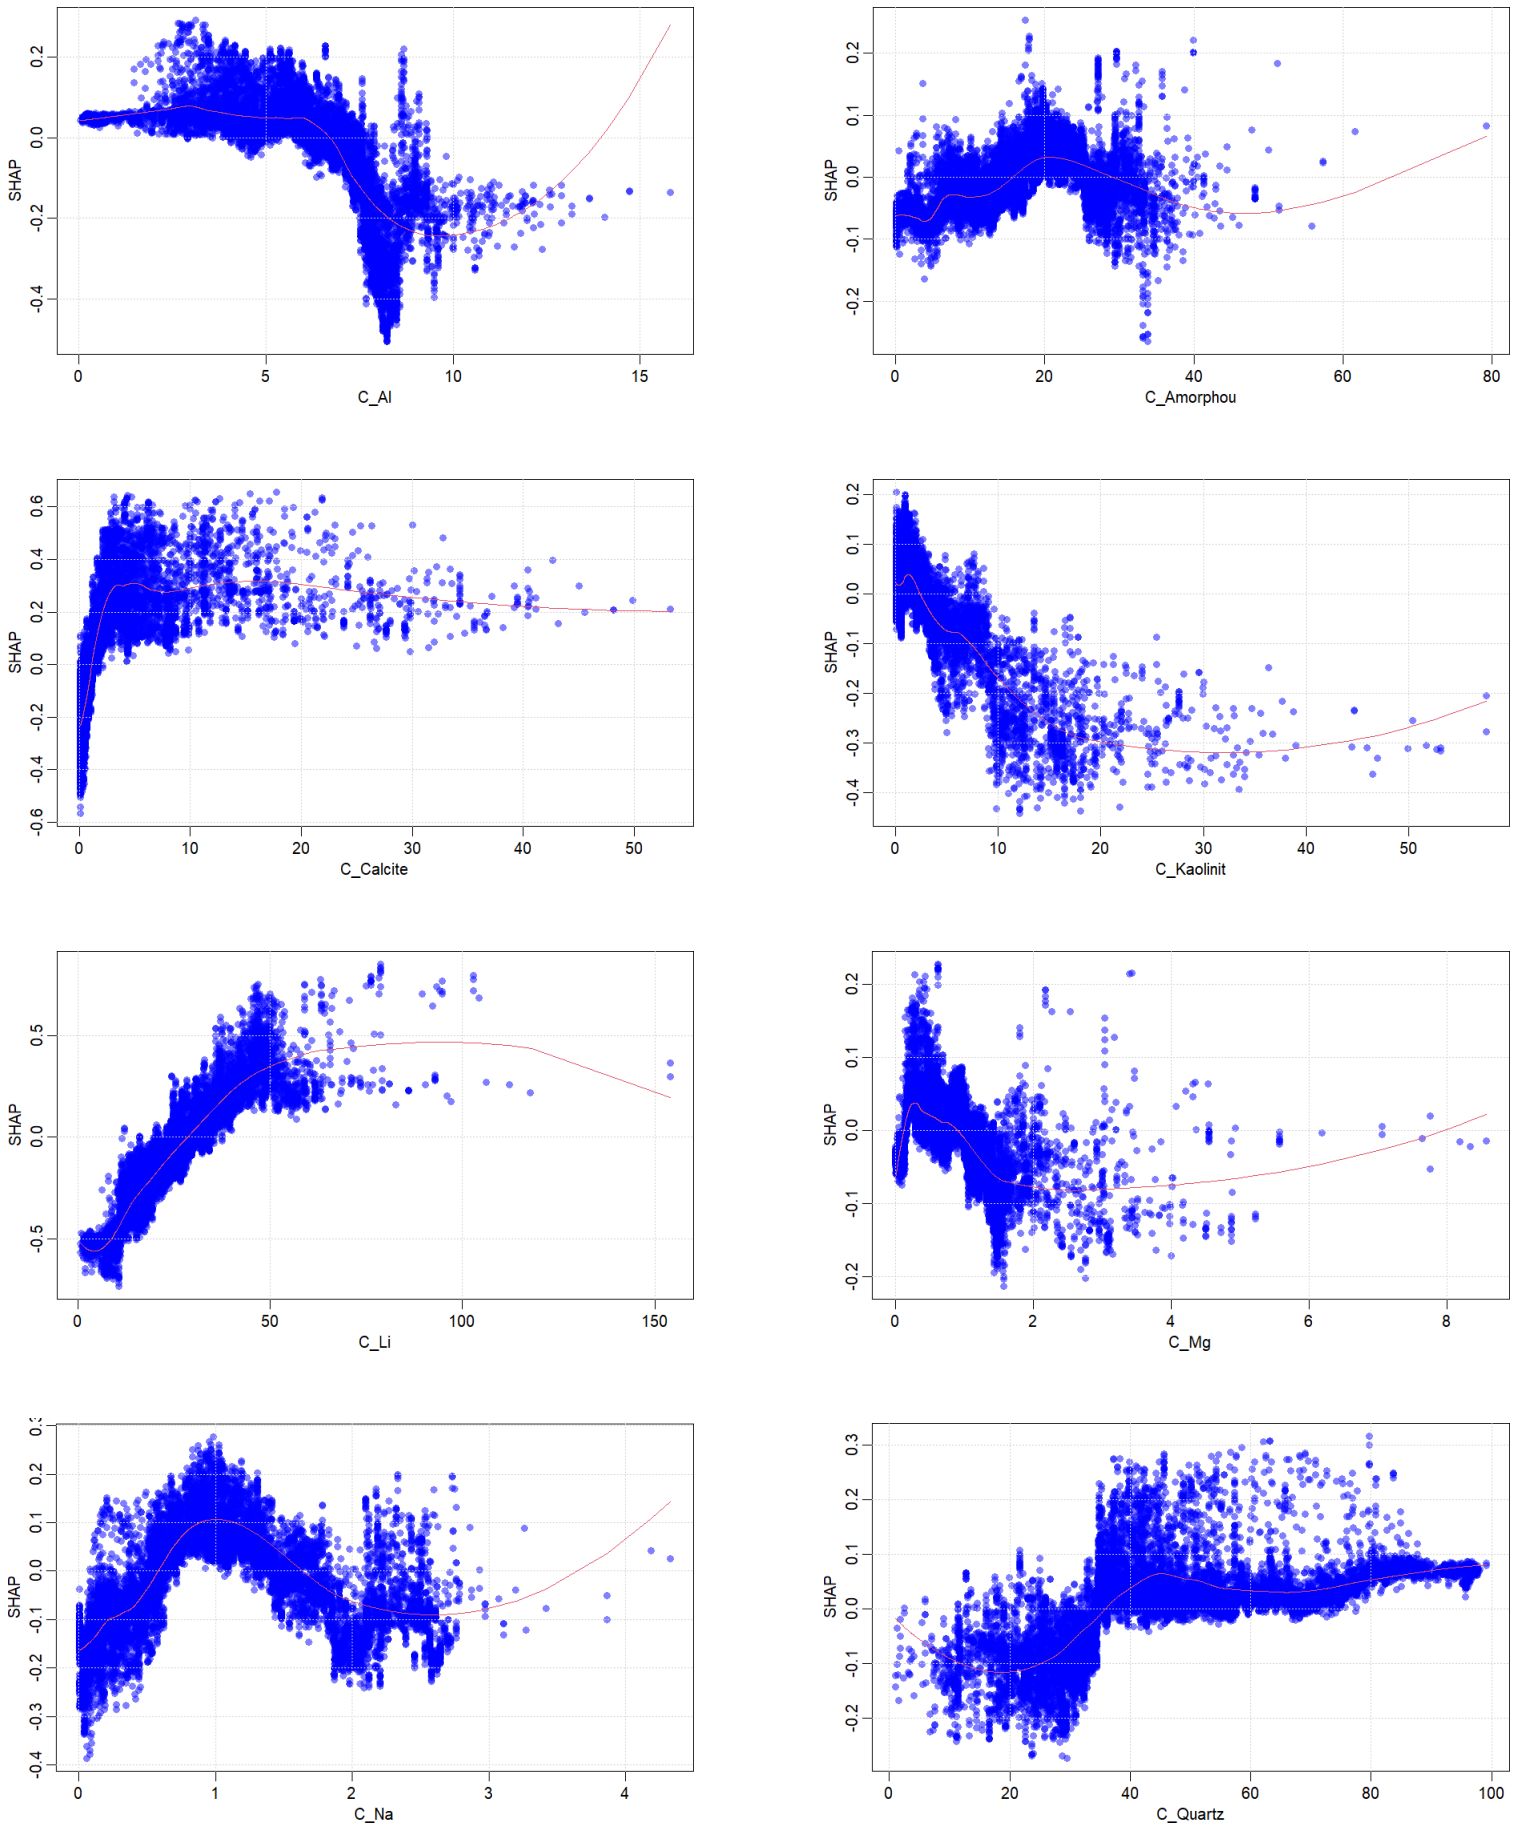

Figure SI\_4 Shapley Additive exPlanation (SHaP) plots for prediction classification of lithium (Li) >30 µg/L. Variable descriptions are provided in Table SI\_3.

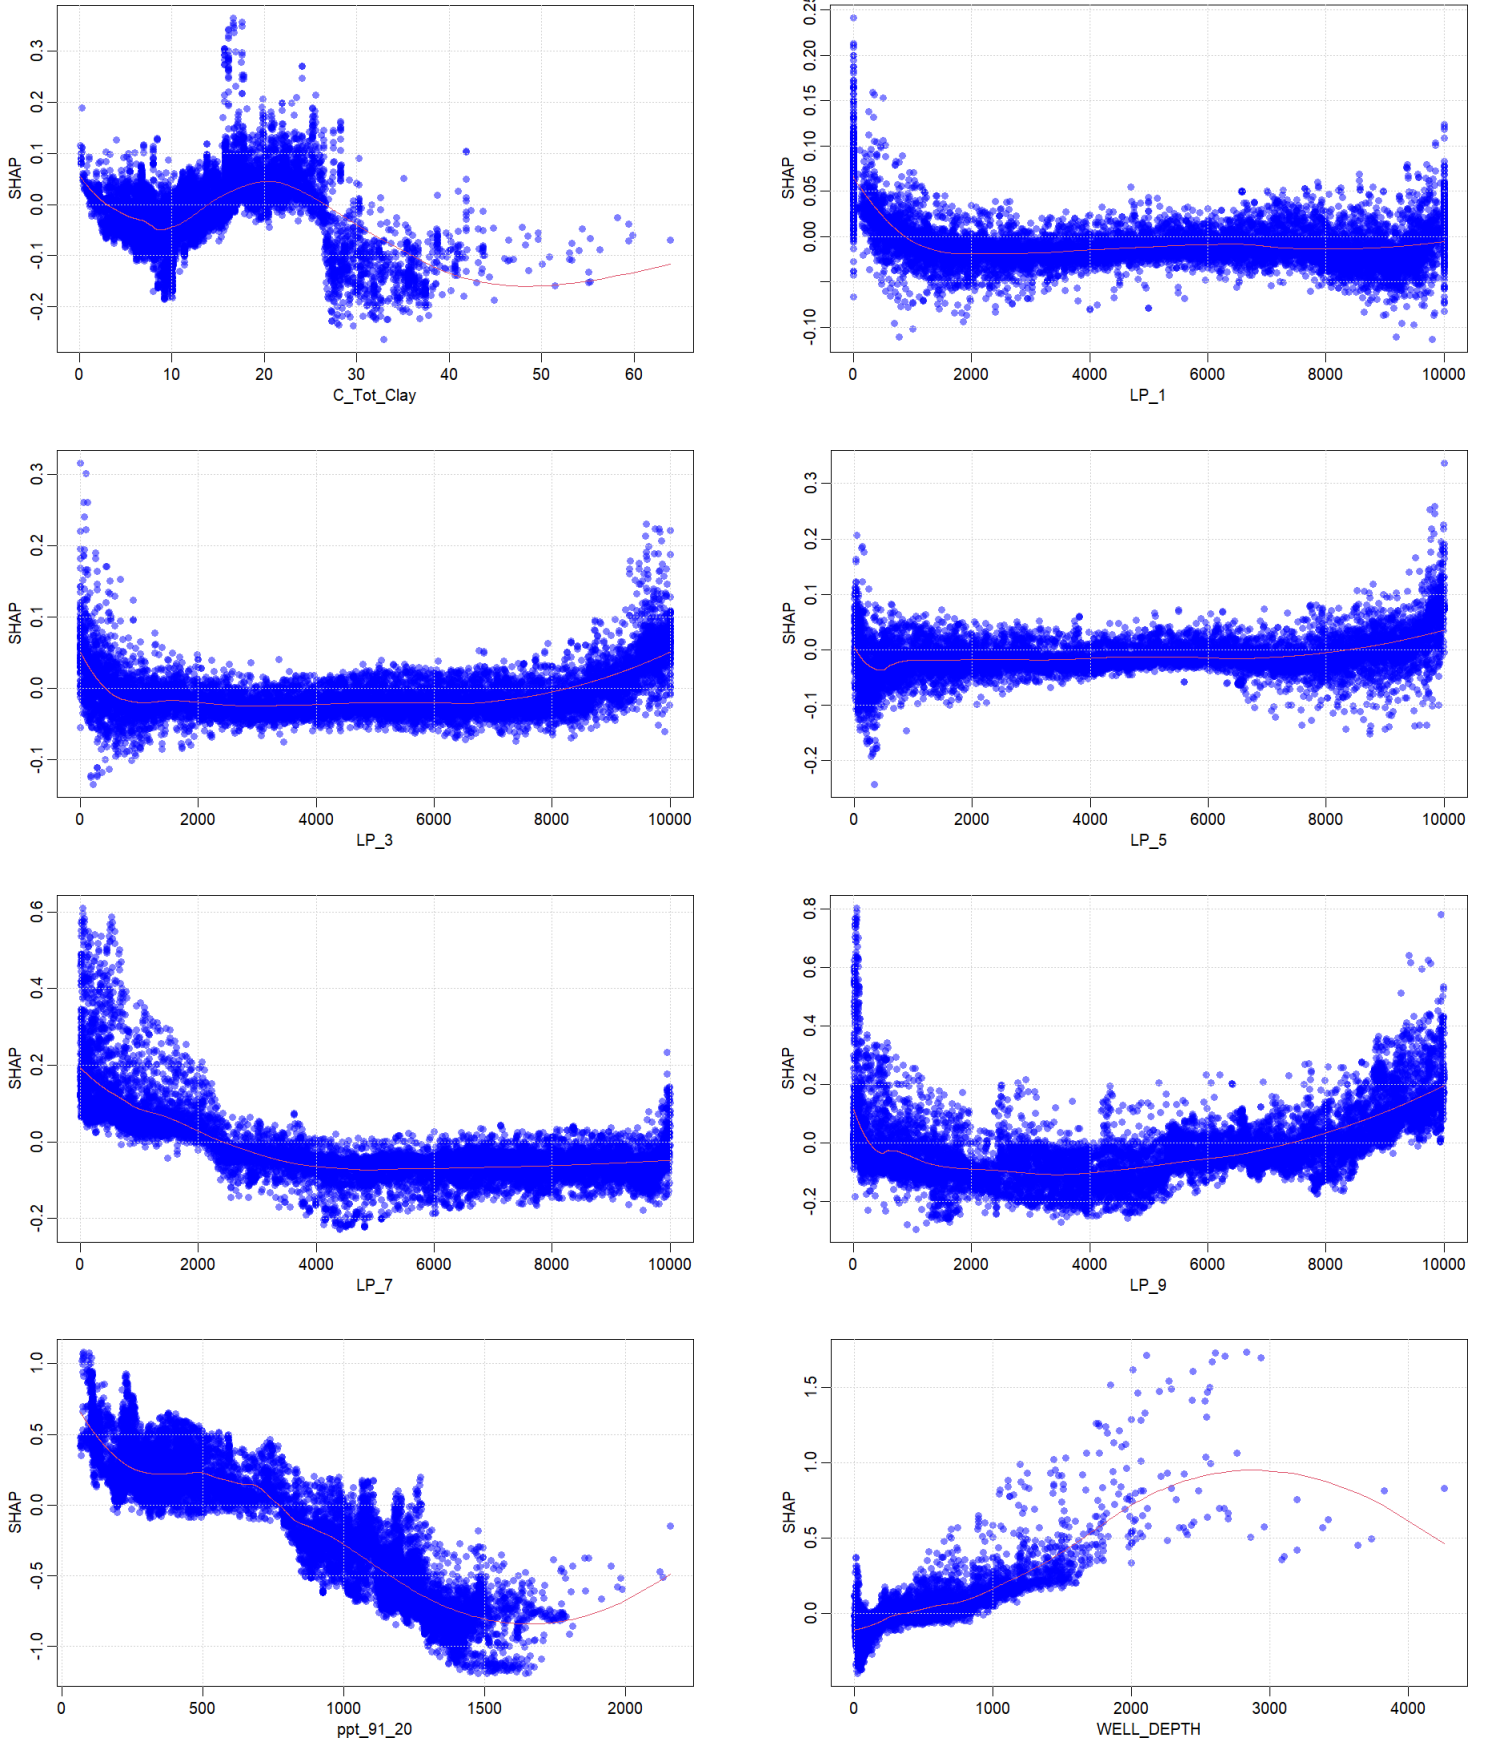



Figure SI\_4 Shapley Additive exPlanation (SHaP) plots for prediction classification of lithium (Li) >30 µg/L. Variable descriptions are provided in Table SI\_3.

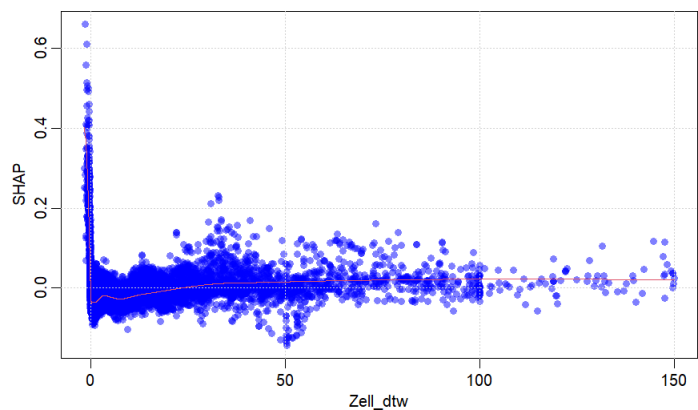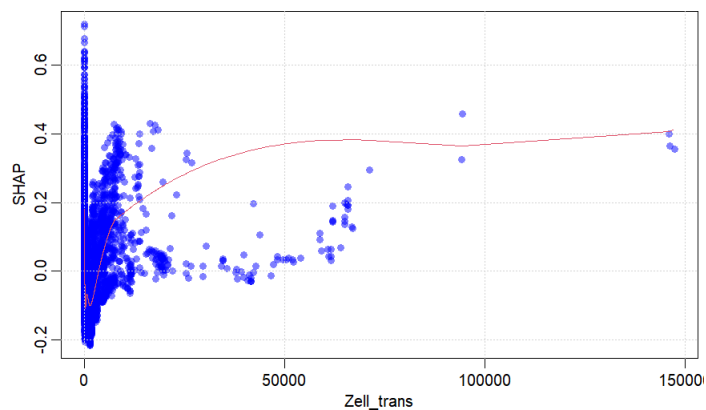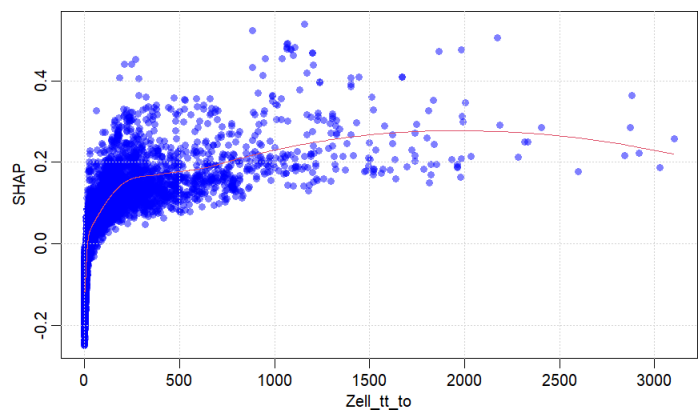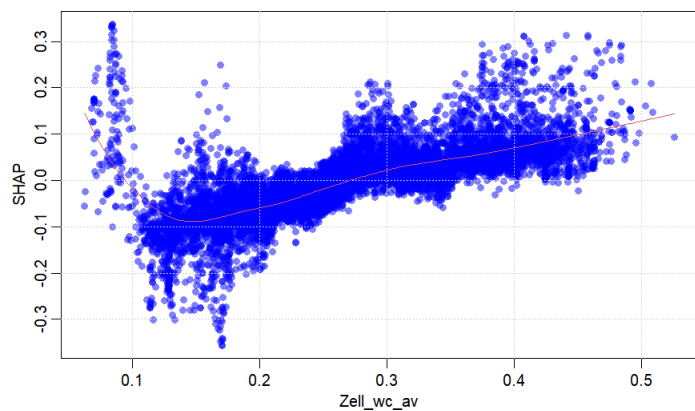

Figure SI\_5 Shapley Additive explanation (SHaP) plots for the overall model. Variable descriptions are provided in Table SI\_3.

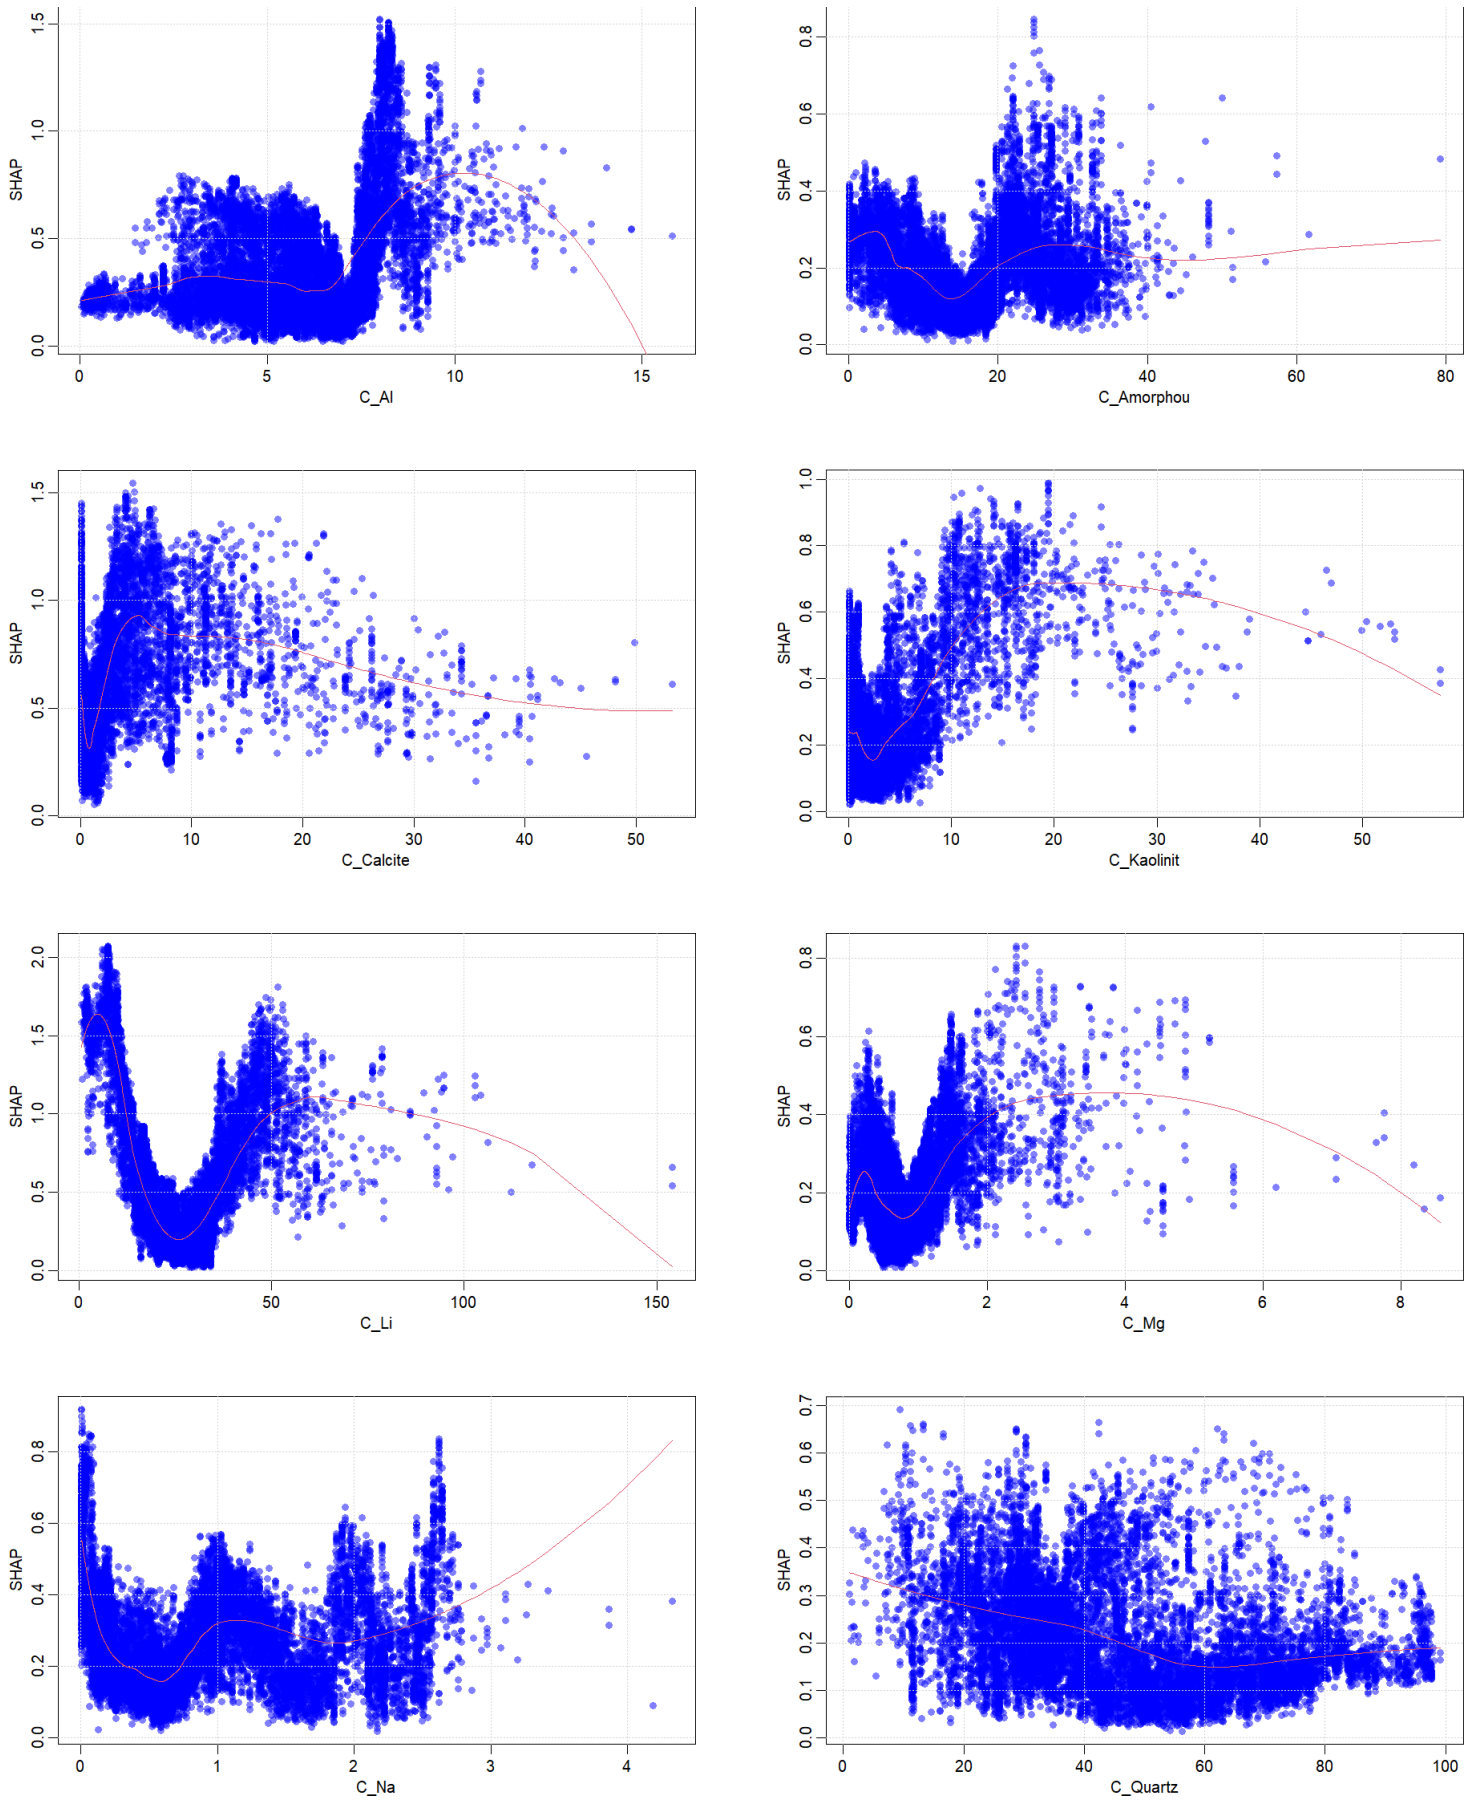

Figure SI\_5 Shapley Additive explanation (SHaP) plots for the overall model. Variable descriptions are provided in Table SI\_3.

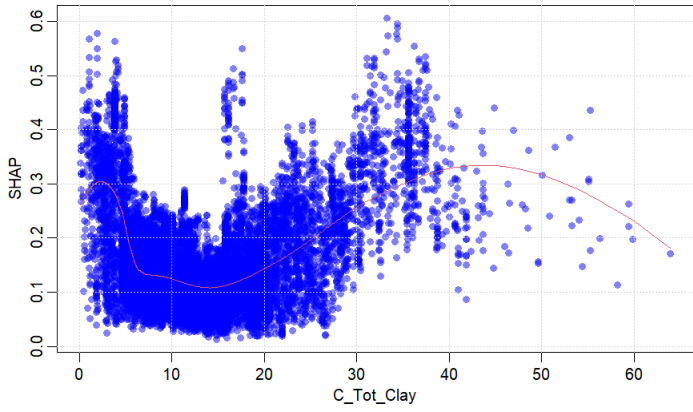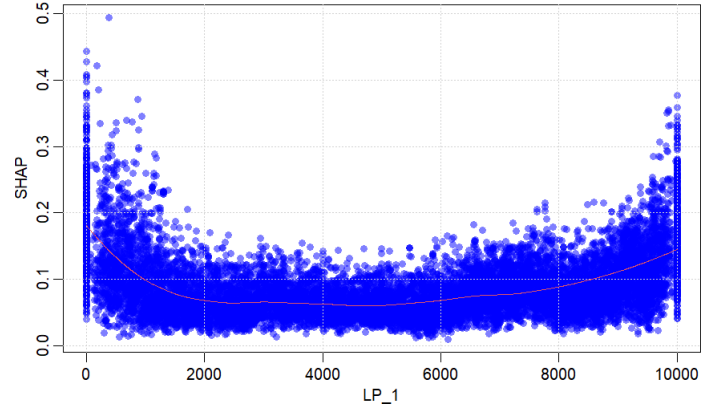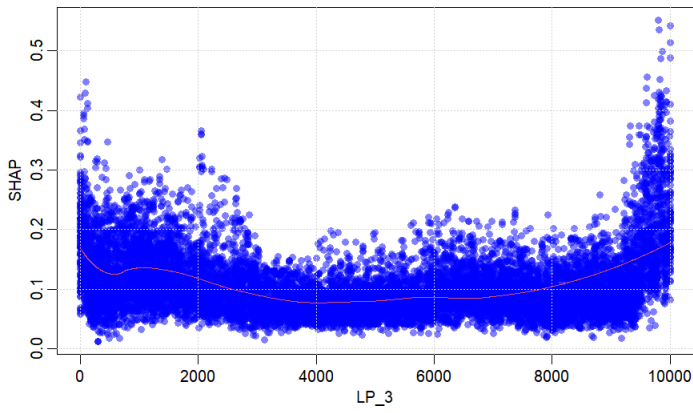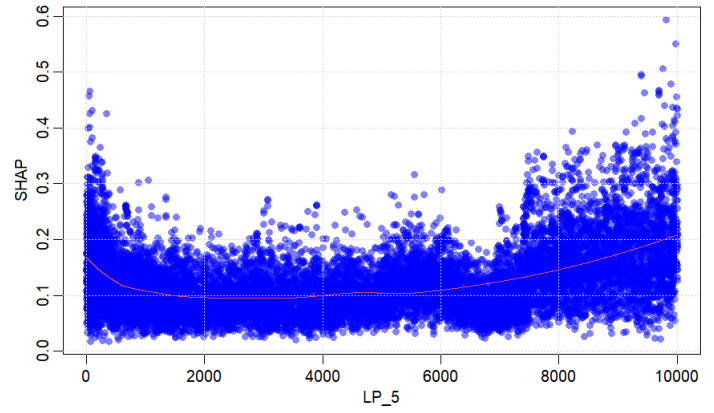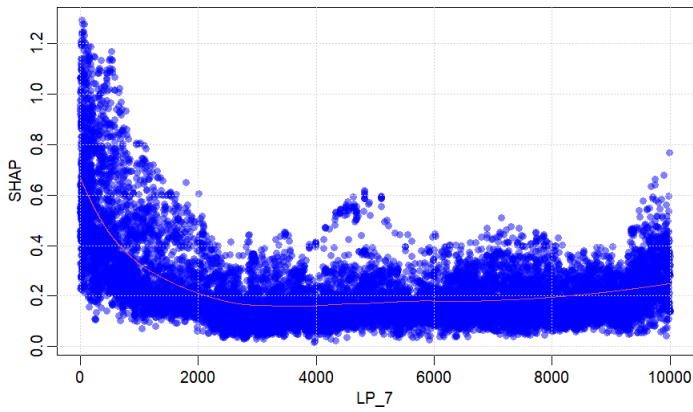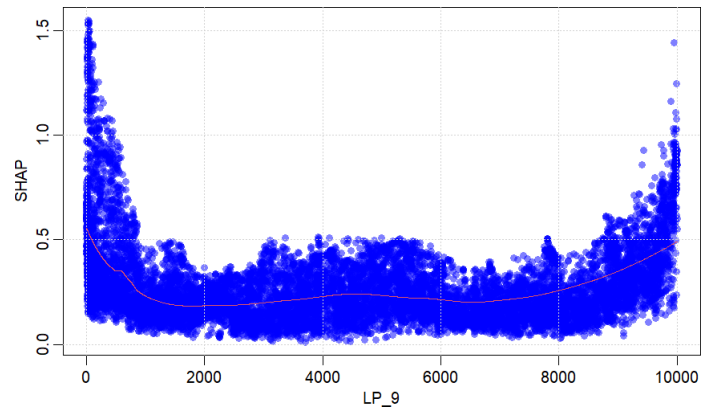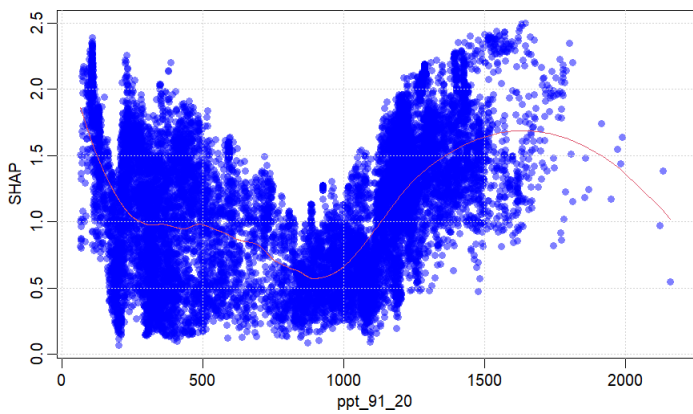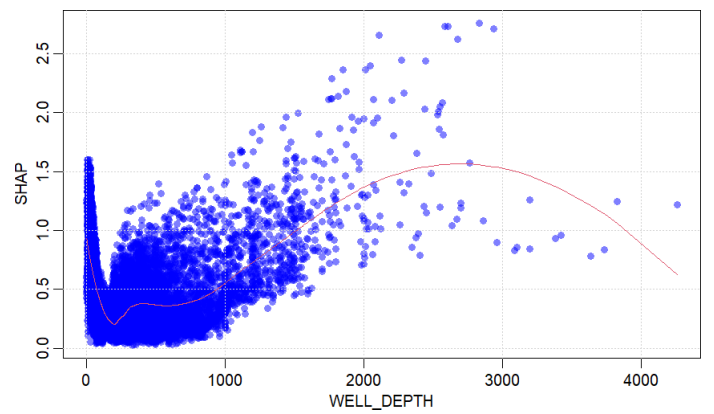

Figure SI\_5 Shapley Additive explanation (SHaP) plots for the overall model. Variable descriptions are provided in Table SI\_3.

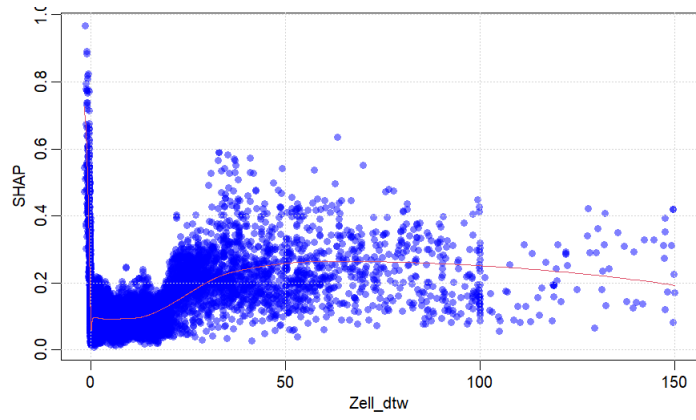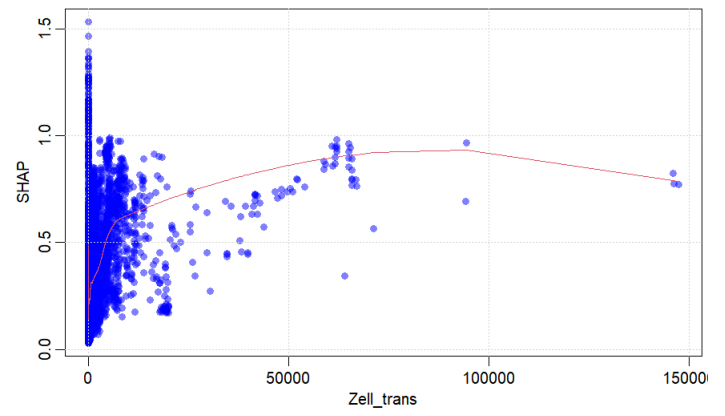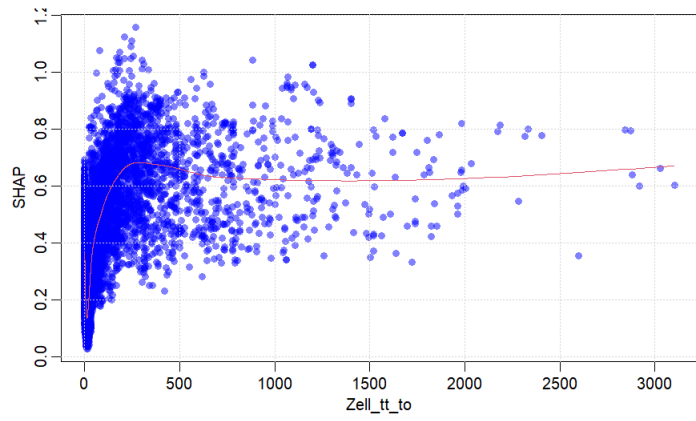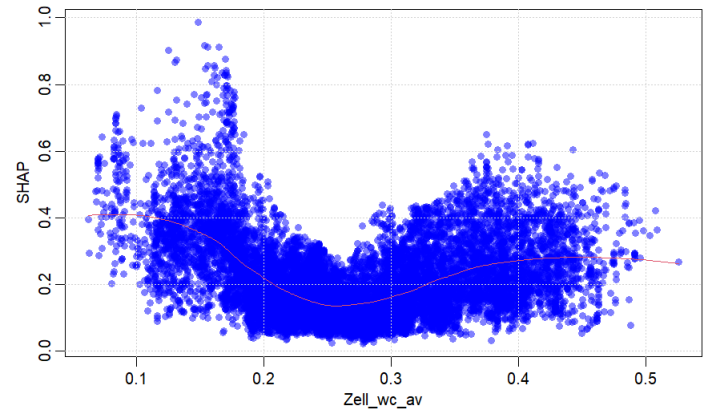

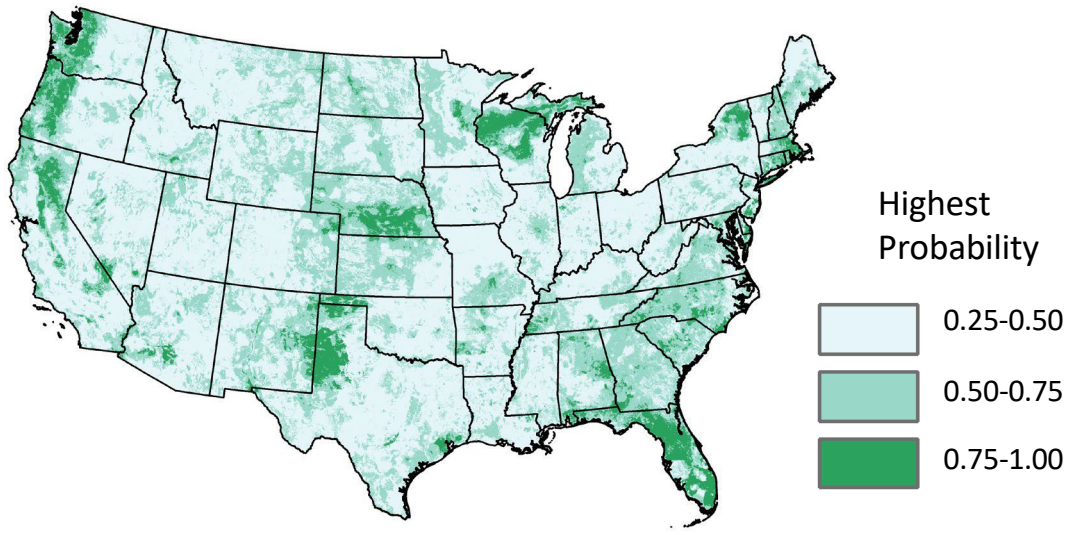

Figure SI\_6. Highest probability for each grid classification for public well depth predictions.
